# Supplementary material
Source: ML conference proceedings conference paper supplement (https://proceedings.neurips.cc/paper_files/paper/2021/hash/09b69adcd7cbae914c6204984097d2da-Abstract.html)
Supplement: Supplementary file 1 [file 09b69adcd7cbae914c6204984097d2da-Supplemental.pdf]

---

# Privately Learning Subspaces

---

Anonymous Author(s)

Affiliation

Address

email

## Abstract

1 Private data analysis suffers a costly curse of dimensionality. However, the data  
2 often has an underlying low-dimensional structure. For example, when optimizing  
3 via gradient descent, the gradients often lie in or near a low-dimensional subspace.  
4 If that low-dimensional structure can be identified, then we can avoid paying (in  
5 terms of privacy or accuracy) for the high ambient dimension.

6 We present differentially private algorithms that take input data sampled from  
7 a low-dimensional linear subspace (possibly with a small amount of error) and  
8 output that subspace (or an approximation to it). These algorithms can serve as a  
9 pre-processing step for other procedures.

## 10 1 Introduction

11 Differentially private algorithms generally have a poor dependence on the dimensionality of their  
12 input. That is, their error or sample complexity grows polynomially with the dimension. For  
13 example, for the simple task of estimating the mean of a distribution supported on  $[0, 1]^d$ , we have  
14 per-coordinate error  $\Theta(\sqrt{d}/n)$  to attain differential privacy, where  $n$  is the number of samples. In  
15 contrast, the non-private error is  $\Theta(\sqrt{\log(d)/n})$ .

16 This cost of dimensionality is inherent [BUV14; SU17; DSSUV15]. Any method with lower error is  
17 susceptible to tracing attacks (a.k.a. membership inference attacks). However, these lower bounds  
18 only apply when the data distribution is “high-entropy.” This leaves open the possibility that we can  
19 circumvent the curse of dimensionality when the data has an underlying low-dimensional structure.

20 Data often does possess an underlying low-dimensional structure. For example, the gradients that  
21 arise in deep learning tend to be close to a low-dimensional subspace [ACGMMTZ16; LXTSG17;  
22 GARD18; LFLY18; LGZCB20; ZWB20; FT20]. Low dimensionality can arise from meaningful  
23 relationships that are at least locally linear, such as income versus tax paid. It can also arise because  
24 we are looking at a function of data with relatively few attributes.

25 A long line of work [BLR08; HT10; HR10; Ull15; BBNS19; BCMNUW20; ZWB20; KRRT20, etc.]  
26 has shown how to exploit structure in the data to attain better privacy and accuracy. However, these  
27 approaches assume that this structure is known *a priori* or that it can be learned from non-private  
28 sources. This raises the question:

29 Can we learn low-dimensional structure from the data subject to differential pri-  
30 vacy?

31 We consider the simple setting where the data lies in  $\mathbb{R}^d$  but is in, or very close to a linear subspace,  
32 of dimension  $k$ . We focus on the setting where  $k \ll d$  and we develop algorithms whose sample  
33 complexity does not depend on the ambient dimension  $d$ ; a polynomial dependence on the true  
34 dimension  $k$  is unavoidable.

35 Our algorithms identify the subspace in question or, if the data is perturbed slightly, an approximation  
 36 to it. Identifying the subspace structure is interesting in its own right, but it also can be used as a  
 37 pre-processing step for further analysis – by projecting to the low-dimensional subspace, we ensure  
 38 subsequent data analysis steps do not need to deal with high-dimensional data.

### 39 1.1 Our Contributions: Privately Learning Subspaces – Exact Case

40 We first consider the exact case, where the data  $X_1, \dots, X_n \in \mathbb{R}^d$  are assumed to lie in a  $k$ -  
 41 dimensional subspace (rather than merely being near to it) – i.e.,  $\text{rank}(A) = k$ , where  $A =$   
 42  $\sum_i^n X_i X_i^T \in \mathbb{R}^{d \times d}$ . In this case, we can also recover the subspace exactly.

43 However, we must also make some non-degeneracy assumptions. We want to avoid a pathological  
 44 input dataset such as the following. Suppose  $X_1, \dots, X_k$  are linearly independent, but  $X_k =$   
 45  $X_{k+1} = X_{k+2} = \dots = X_n$ . While we can easily reveal the repeated data point, we cannot reveal  
 46 anything about the other points due to the privacy constraint.

47 A natural non-degeneracy assumption would be to assume that the data points are in “general position”  
 48 – that is, that there are no non-trivial linear dependencies among the data points. This means that *every*  
 49 set of  $k$  data points spans the subspace or, equivalently, no subspace of dimension  $k - 1$  contains  
 50 more than  $k - 1$  data points. This is a very natural assumption – if the data consists of  $n$  samples  
 51 from a continuous distribution on the subspace, then this holds with probability 1. We relax this  
 52 assumption slightly and assume that no subspace of dimension  $k - 1$  contains more than  $\ell$  data points.  
 53 We also assume that all points are non-zero. Note that we define subspaces to pass through the origin;  
 54 our results can easily be extended to affine subspaces.

55 **Theorem 1.1** (Main Result – Exact Case). *For all  $n, d, k, \ell \in \mathbb{N}$  and  $\varepsilon, \delta > 0$  satisfying  $n \geq$   
 56  $O\left(\ell + \frac{\log(1/\delta)}{\varepsilon}\right)$ , there exists a randomized algorithm  $M : \mathbb{R}^{d \times n} \rightarrow \mathcal{S}_d^k$  satisfying the following.  
 57 Here  $\mathcal{S}_d^k$  denotes the set of all  $k$ -dimensional subspaces of  $\mathbb{R}^d$ .*

- 58 •  $M$  is  $(\varepsilon, \delta)$ -differentially private with respect to changing one column of its input.
- 59 • Let  $X = (X_1, \dots, X_n) \in \mathbb{R}^{d \times n}$ . Suppose there exists a  $k$ -dimensional subspace  $S_* \in \mathcal{S}_d^k$   
 60 that contains all but  $\ell$  of the points – i.e.,  $|\{i \in [n] : X_i \in S_*\}| \geq n - \ell$ . Further suppose  
 61 that any  $(k - 1)$ -dimensional subspace contains at most  $\ell$  points – i.e., for all  $S \in \mathcal{S}_d^{k-1}$ ,  
 62 we have  $|\{i \in [n] : X_i \in S\}| \leq \ell$ . Then  $\mathbb{P}[M(X) = S_*] = 1$ .

63 The parameter  $\ell$  in Theorem 1.1 can be thought of as a robustness parameter. Ideally the data points  
 64 are in general position, in which case  $\ell = k - 1$ . If a few points are corrupted, then we increase  $\ell$   
 65 accordingly; our algorithm can tolerate the corruption of a small constant fraction of the data points.  
 66 Theorem 1.1 is optimal in the sense that  $n \geq \Omega\left(\ell + \frac{\log(1/\delta)}{\varepsilon}\right)$  samples are required.

### 67 1.2 Our Contributions: Privately Learning Subspaces – Approximate Case

68 Next we turn to the substantially more challenging approximate case, where the data  $X_1, \dots, X_n \in$   
 69  $\mathbb{R}^d$  are assumed to be close to a  $k$ -dimensional subspace, but are not assumed to be contained within  
 70 that subspace. Our algorithm for the exact case is robust to changing a few points, but very brittle  
 71 if we change all the points by a little bit. Tiny perturbations of the data points (due to numerical  
 72 errors or measurement imprecision) could push the point outside the subspace, which would cause  
 73 the algorithm to fail. Thus it is important to for us to cover the approximate case and our algorithm  
 74 for the approximate is entirely different from our algorithm for the exact case.

75 The approximate case requires us to precisely quantify how close the input data and our output are  
 76 to the subspace and we also need to make quantitative non-degeneracy assumptions. It is easiest to  
 77 formulate this via a distributional assumption. We will assume that the data comes from a Gaussian  
 78 distribution where the covariance matrix has a certain eigenvalue gap. This is a strong assumption  
 79 and we emphasize that this is only for ease of presentation; our algorithm works under weaker  
 80 assumptions. Furthermore, we stress that the differential privacy guarantee is worst-case and does not  
 81 depend on any distributional assumptions.

82 We assume that the data is drawn from a multivariate Gaussian  $\mathcal{N}(0, \Sigma)$ . Let  $\lambda_1(\Sigma) \geq \lambda_2(\Sigma) \geq$   
 83  $\dots \geq \lambda_d(\Sigma)$  be the eigenvalues of  $\Sigma \in \mathbb{R}^{d \times d}$ . We assume that there are  $k$  large eigenval-

ues  $\lambda_1(\Sigma), \dots, \lambda_k(\Sigma)$  – these represent the “signal” we want – and  $d - k$  small eigenvalues  $\lambda_{k+1}(\Sigma), \dots, \lambda_d(\Sigma)$  – these are the “noise”. Our goal is to recover the subspace spanned by the eigenvectors corresponding to the  $k$  largest eigenvalues  $\lambda_1(\Sigma), \dots, \lambda_k(\Sigma)$ . Our assumption is that there is a large *multiplicative* gap between the large and small eigenvalues. Namely, we assume

$$\frac{\lambda_{k+1}(\Sigma)}{\lambda_k(\Sigma)} \leq \frac{1}{\text{poly}(d)}.$$

**Theorem 1.2** (Main Result – Approximate Case). *For all  $n, d, k \in \mathbb{N}$  and  $\alpha, \gamma, \varepsilon, \delta > 0$  satisfying*

$$n \geq \Theta\left(\frac{k \log(1/\delta)}{\varepsilon} + \frac{\ln(1/\delta) \ln(\ln(1/\delta)/\varepsilon)}{\varepsilon}\right) \text{ and } \gamma^2 \leq \Theta\left(\frac{\varepsilon \alpha^2 n}{d^2 k^3 \log(1/\delta)} \cdot \min\left\{\frac{1}{k}, \frac{1}{\log(k \log(1/\delta)/\varepsilon)}\right\}\right),$$

there exists an algorithm  $M : \mathbb{R}^{d \times n} \rightarrow \mathcal{S}_d^k$  satisfying the following. Here  $\mathcal{S}_d^k$  is the set of all  $k$ -dimensional subspaces of  $\mathbb{R}^d$  represented as projection matrices – i.e.,  $\mathcal{S}_d^k = \{\Pi \in \mathbb{R}^{d \times d} : \Pi^2 = \Pi = \Pi^T, \text{rank}(\Pi) = k\}$ .

- $M$  is  $(\varepsilon, \delta)$ -differentially private with respect to changing one column of its input.
- Let  $X_1, \dots, X_n$  be independent samples from  $\mathcal{N}(0, \Sigma)$ . Let  $\lambda_1(\Sigma) \geq \lambda_2(\Sigma) \geq \dots \geq \lambda_d(\Sigma)$  be the eigenvalues of  $\Sigma \in \mathbb{R}^{d \times d}$ . Suppose  $\lambda_{k+1}(\Sigma) \leq \gamma^2 \cdot \lambda_k(\Sigma)$ . Let  $\Pi \in \mathcal{S}_d^k$  be the projection matrix onto the subspace spanned by the eigenvectors corresponding to the  $k$  largest eigenvalues of  $\Sigma$ . Then  $\mathbb{P}[\|\Pi M(X) - \Pi\| \leq \alpha] \geq 0.7$ .

The sample complexity of our algorithm  $n = O(k \log(1/\delta)/\varepsilon)$  is independent of the ambient dimension  $d$ ; this is ideal. We can also boost the accuracy guarantees at a small (dimension independent) cost in sample complexity, as shown in Section E. However, there is a polynomial dependence on  $d$  in  $\gamma$ , which controls the multiplicative eigenvalue gap. This multiplicative eigenvalue gap is a strong assumption, but it is also a necessary assumption if we want the sample complexity  $n$  to be independent of the dimension  $d$ . In fact, it is necessary *even without the differential privacy constraint* [CZ16]. That is, if we did not assume an eigenvalue gap that depends polynomially on the ambient dimension  $d$ , then it would be impossible to estimate the subspace with sample complexity  $n$  that is independent of the ambient dimension  $d$  even in the non-private setting.

Our algorithm is based on the subsample and aggregate framework [NRS07] and a differentially private histogram algorithm. These methods are generally quite robust and thus our algorithm is, too. For example, our algorithm can tolerate  $o(n/k)$  input points being corrupted arbitrarily. We also believe that our algorithm’s utility guarantee is robust to relaxing the Gaussianity assumption. All that we require in the analysis is that the empirical covariance matrix of a few samples from the distribution is sufficiently close to its expectation  $\Sigma$  with high probability.

## 2 Related Work

To the best of our knowledge, the problem of privately learning subspaces, as we formulate it, has not been studied before. However, a closely-related line of work is on Private Principal Component Analysis (PCA) and low-rank approximations. We briefly discuss this extensive line of work below, but first we note that, in our setting, all of these techniques have a sample complexity  $n$  that grows polynomially with the ambient dimension  $d$ . Thus, they do not evade privacy’s curse of dimensionality. However, we make a stronger assumption than these prior works – namely, we assume a large multiplicative eigenvalue gap. (Many of the prior works consider an *additive* eigenvalue gap, which is a weaker assumption.)

There has been a lot of interest in Private PCA, matrix completion, and low-rank approximation. One motivation for this is the infamous Netflix prize, which can be interpreted as a matrix completion problem. The competition was cancelled after researchers showed that the public training data revealed the private movie viewing histories of many of Netflix’s customers [NS06]. Thus privacy is a real concern for matrix analysis tasks.

Many variants of these problems have been considered: Some provide approximations to the data matrix  $X = (X_1, \dots, X_n) \in \mathbb{R}^{d \times n}$ ; others approximate the covariance matrix  $A = \sum_i^n X_i X_i^T \in \mathbb{R}^{d \times d}$  (as we do). There are also different forms of approximation – we can either produce a subspace or an approximation to the entire matrix, and the approximation can be measured by different norms (we consider the operator norm between projection matrices). Importantly, we define differential

132 privacy to allow one data point  $X_i$  to be changed arbitrarily, whereas most of the prior work assumes  
133 a bound on the norm of the change or even assumes that only one coordinate of one vector can be  
134 changed. In the discussion below we focus on the techniques that have been considered for these  
135 problems, rather than the specific results and settings.

136 Dwork, Talwar, Thakurta, and Zhang [DTTZ14] consider the simple algorithm which adds indepen-  
137 dent Gaussian noise to each of entries of the covariance matrix  $A$ , and then perform analysis on the  
138 noisy matrix. (In fact, this algorithm predates the development of differential privacy [BDMN05]  
139 and was also analyzed under differential privacy by McSherry and Mironov [MM09] and Chaudhuri,  
140 Sarwate, and Sinha [CSS12].) This simple algorithm is versatile and several bounds are provided for  
141 the accuracy of the noisy PCA. The downside of this is that a polynomial dependence on the ambient  
142 dimension  $d$  is inherent – indeed, they prove a sample complexity lower bound of  $n = \tilde{\Omega}(\sqrt{d})$  for any  
143 algorithm that identifies a useful approximation to the top eigenvector of  $A$ . This lower bound does  
144 not contradict our results because the relevant inputs do not satisfy our near low-rank assumption.

145 Hardt and Roth [HR12] and Arora, Braverman, and Upadhyay [ABU18] apply techniques from  
146 dimensionality reduction to privately compute a low-rank approximation to the input matrix  $X$ . Hardt  
147 and Roth [HR13] and Hardt and Price [HP13] use the power iteration method with noise injected at  
148 each step to compute low-rank approximations to the input matrix  $X$ . In all of these, the underlying  
149 privacy mechanism is still noise addition and the results still require the sample complexity to grow  
150 polynomially with the ambient dimension to obtain interesting guarantees. (However, the results can  
151 be dimension-independent if we define differential privacy so that only one entry – as opposed to one  
152 column – of the matrix  $X$  can be changed by 1. This is a significantly weaker privacy guarantee.)

153 Blocki, Blum, Datta, and Sheffet [BBDS12] and Sheffet [She19] also use tools from dimensionality  
154 reduction; they approximate the covariance matrix  $A$ . However, they show that the dimensionality  
155 reduction step itself provides a privacy guarantee (whereas the aforementioned results did not exploit  
156 this and relied on noise added at a later stage). Sheffet [She19] analyzes two additional techniques  
157 – the addition of Wishart noise (i.e.,  $YY^T$  where the columns of  $Y$  are independent multivariate  
158 Gaussians) and sampling from an inverse Wishart distribution (which has a Bayesian interpretation).

159 Chaudhuri, Sarwate, and Sinha [CSS12], Kapralov and Talwar [KT13], Wei, Sarwate, Corander,  
160 Hero, and Tarokh [WSCHT16], and Amin, Dick, Kulesza, Medina, and Vassilvitskii [ADKMV18]  
161 apply variants of the exponential mechanism [MT07] to privately select a low-rank approximation  
162 to the covariance matrix  $A$ . This method is nontrivial to implement and analyse, but it ultimately  
163 requires the sample complexity to grow polynomially in the ambient dimension.

164 Gonen and Gilad-Bachrach [GGB18] exploit smooth sensitivity [NRS07] to release a low-rank  
165 approximation to the matrix  $A$ . This allows them to add less noise than using worst case sensitivity,  
166 under an eigenvalue gap assumption. However, the sample complexity  $n$  remains polynomial in the  
167 dimension  $d$ .

## 168 2.1 Limitations of Prior Work

169 Given the great variety of techniques and analyses that have been applied to differentially private  
170 matrix analysis problems, what is missing? We see that almost all of these techniques are ultimately  
171 based on some form of noise addition or the exponential mechanism. With the singular exception  
172 of the techniques of Sheffet [She19], all of these prior techniques satisfy pure<sup>1</sup> or concentrated  
173 differential privacy [BS16]. This is enough to conclude that these techniques cannot yield the  
174 dimension-independent guarantees that we seek. No amount of postprocessing or careful analysis can  
175 avoid this limitation. This is because pure and concentrated differential privacy have strong group  
176 privacy properties, which means “packing” lower bounds [HT10] apply.

177 We briefly sketch why concentrated differential privacy is incompatible with dimension-independent  
178 guarantees. Let the input be  $X_1 = X_2 = \dots = X_n = \xi/\sqrt{d}$  for a uniformly random  $\xi \in \{-1, +1\}^d$ .  
179 That is, the input is one random point repeated  $n$  times. If  $M$  satisfies  $O(1)$ -concentrated differential  
180 privacy, then it satisfies the mutual information bound  $I(M(X); X) \leq O(n^2)$  [BS16]. But, if  $M$   
181 provides a meaningful approximation to  $X$  or  $A = XX^T$ , then we must be able to recover an  
182 approximation to  $\xi$  from its output, whence  $I(M(X); X) \geq \Omega(d)$ , as the entropy of  $X$  is  $d$  bits. This  
183 gives a lower bound of  $n \geq \Omega(\sqrt{d})$ , even though  $X$  and  $A$  have rank  $k = 1$ .

---

<sup>1</sup>Pure differential privacy (a.k.a. pointwise differential privacy) is  $(\epsilon, \delta)$ -differential privacy with  $\delta = 0$ .

184 The above example shows that, even under the strongest assumptions (i.e., the data lies exactly in a  
 185 rank-1 subspace), any good approximation to the subspace, to the data matrix  $X$ , or to the covariance  
 186 matrix  $A = XX^T$  must require the sample complexity  $n$  to grow polynomially in the ambient  
 187 dimension  $d$  if we restrict to techniques that satisfy concentrated differential privacy. Almost all of  
 188 the prior work in this general area is subject to this restriction.

189 To avoid a sample complexity  $n$  that grows polynomially with the ambient dimension  $d$ , we need  
 190 fundamentally new techniques.

### 191 3 Overview of Our Techniques

192 For the exact case, we construct a score function for subspaces that has low sensitivity, assigns high  
 193 score to the correct subspace, and assigns a low score to all other subspaces. Then we can simply  
 194 apply a GAP-MAX algorithm to privately select the correct subspace [BDRS18].

195 The GAP-MAX algorithm satisfies  $(\epsilon, \delta)$ -differential privacy and outputs the correct subspace as  
 196 long as the gap between its score and that of any other subspace is larger than  $O(\log(1/\delta)/\epsilon)$ . This  
 197 works even though there are infinitely many subspaces to consider, which would not be possible  
 198 under concentrated differential privacy.

199 The simplest score function would simply be the number of input points that the subspace contains.  
 200 This assigns high score to the correct subspace, but it also assigns high score to any larger subspace  
 201 that contains the correct subspace. To remedy this, we subtract from the score the number of points  
 202 contained in a strictly smaller subspace. That is, the score of subspace  $S$  is the number of points in  $S$   
 203 minus the maximum over all subspaces  $S' \subsetneq S$  of the number of points contained in  $S'$ .

204 This GAP-MAX approach easily solves the exact case, but it does not readily extend to the approxi-  
 205 mate case. If we count points near to the subspace, rather than in it, then (infinitely) many subspaces  
 206 will have high score, which violates the assumptions needed for GAP-MAX to work. Thus we use a  
 207 completely different approach for the approximate case.

208 We apply the “subsample and aggregate” paradigm of [NRS07]. That is, we split the dataset  
 209  $X_1, \dots, X_n$  into  $n/O(k)$  sub-datasets each of size  $O(k)$ . We use each sub-dataset to compute  
 210 an approximation to the subspace by doing a (non-private) PCA on the sub-dataset. Let  $\Pi$  be the  
 211 projection matrix onto the correct subspace and  $\Pi_1, \dots, \Pi_{n/O(k)}$  the projection matrices onto the  
 212 approximations derived from the sub-datasets. With high probability  $\|\Pi_j - \Pi\|$  is small for most  
 213  $j$ . (Exactly how small depends on the eigengap.) Now we must privately aggregate the projection  
 214 matrices  $\Pi_1, \dots, \Pi_{n/O(k)}$  into a single projection matrix.

215 Rather than directly trying to aggregate the projection matrices, we pick a set of reference points,  
 216 project them onto the subspaces, and then aggregate the projected points. We draw  $p_1, \dots, p_{O(k)}$   
 217 independently from a standard spherical Gaussian. Then  $\|\Pi_j p_i - \Pi p_i\| \leq \|\Pi_j - \Pi\| \cdot O(\sqrt{k})$  is  
 218 also small for all  $i$  and most  $j$ . We wish to privately approximate  $\Pi p_i$  and to do this we have  $n/O(k)$   
 219 points  $\Pi_j p_i$  most of which are close to  $\Pi p_i$ . This is now a location or mean estimation problem,  
 220 which we can solve privately. Thus we obtain points  $\hat{p}_i$  such that  $\|\hat{p}_i - \Pi p_i\|$  is small for all  $i$ . From  
 221 a PCA of these points we can obtain a projection  $\hat{\Pi}$  with  $\|\hat{\Pi} - \Pi\|$  being small, as required.

222 Finally, we discuss how to privately obtain  $(\hat{p}_1, \hat{p}_2, \dots, \hat{p}_{O(k)})$  from  $(\Pi_1 p_1, \dots, \Pi_1 p_{O(k)}), \dots,$   
 223  $(\Pi_{n/O(k)} p_1, \dots, \Pi_{n/O(k)} p_{O(k)})$ . It is better here to treat  $(\hat{p}_1, \hat{p}_2, \dots, \hat{p}_{O(k)})$  as a single vector in  
 224  $\mathbb{R}^{O(kd)}$ , rather than as  $O(k)$  vectors in  $\mathbb{R}^d$ . We split  $\mathbb{R}^{O(kd)}$  into cells and then run a differenti-  
 225 ally private histogram algorithm. If we construct the cells carefully, for most  $j$  we have that  
 226  $(\Pi_j p_1, \dots, \Pi_j p_{O(k)})$  is in the same histogram cell as the desired point  $(\Pi p_1, \dots, \Pi p_{O(k)})$ . The  
 227 histogram algorithm will thus identify this cell, and we take an arbitrary point from this cell as our  
 228 estimate  $(\hat{p}_1, \hat{p}_2, \dots, \hat{p}_{O(k)})$ . The differentially private histogram algorithm is run over exponentially  
 229 many cells, which is possible under  $(\epsilon, \delta)$ -differential privacy if  $n/O(k) \geq O(\log(1/\delta)/\epsilon)$ . (Note  
 230 that under concentrated differential privacy the histogram algorithm’s sample complexity  $n$  would  
 231 need to depend on the number of cells and, hence, the ambient dimension  $d$ .)

232 The main technical ingredients in the analysis of our algorithm for the approximate case are matrix  
 233 perturbation and concentration analysis and the location estimation procedure using differentially  
 234 private histograms. Our matrix perturbation analysis uses a variant of the Davis-Kahan theorem to

235 show that if the empirical covariance matrix is close to the true covariance matrix, then the subspaces  
 236 corresponding to the top  $k$  eigenvalues of each are also close; this is applied to both the subsamples  
 237 and the projection of the reference points. The matrix concentration results that we use show that the  
 238 empirical covariance matrices in all the subsamples are close to the true covariance matrix. This is  
 239 the only place where the multivariate Gaussian assumption arises. Any distribution that concentrates  
 240 well will work.

## 241 4 Exact case

242 Here, we discuss the case, where all  $n$  points lie *exactly* in a subspace  $s_*$  of dimension  $k$  of  $\mathbb{R}^d$ . Our  
 243 goal is to privately output that subspace. We do it under the assumption that all strict subspaces of  $s_*$   
 244 contain at most  $\ell$  points. If the points are in general position, then  $\ell = k - 1$ , as any strictly smaller  
 245 subspace has dimension  $< k$  and cannot contain more points than its dimension. Let  $\mathcal{S}_d^k$  be the set of  
 246 all  $k$ -dimensional subspaces of  $\mathbb{R}^d$ . Let  $\mathcal{S}_d$  be the set of all subspaces of  $\mathbb{R}^d$ . We formally define that  
 247 problem as follows.

248 **Problem 4.1.** Assume (i) all but at most  $\ell$ , input points are in some  $s_* \in \mathcal{S}_d^k$ , and (ii) every subspace  
 249 of dimension  $< k$  contains at most  $\ell$  points. (If the points are in general position – aside from being  
 250 contained in  $s_*$  – then  $\ell = k - 1$ .) The goal is to output a representation of  $s_*$ .

251 We call these  $\leq \ell$  points that do not lie in  $s_*$ , “adversarial points”.

252 We prove Theorem 1.1 by proving the privacy and the accuracy guarantees of Algorithm 1. The  
 253 algorithm performs a GAP-MAX (cf. Lemma A.16). It assigns a score to all the relevant subspaces,  
 254 that is, the subspaces spanned by the points of the dataset  $X$ . We show that the only subspace  
 255 that has a high score is the true subspace  $s_*$ , and the rest of the subspaces have low scores. Then  
 256 GAP-MAX outputs the true subspace successfully because of the gap between the scores of the best  
 257 subspace and the second to the best one. For GAP-MAX to work all the time, we define a default  
 258 option in the output space that has a high score, which we call NULL. Thus, the output space is now  
 259  $\mathcal{Y} = \mathcal{S}_d \cup \{\text{NULL}\}$ . Also, for GAP-MAX to run in finite time, we filter  $\mathcal{S}_d$  to select finite number of  
 260 subspaces that have at least 0 scores on the basis of  $X$ . Note that this is a preprocessing step, and  
 261 does not violate privacy as, we will show, all other subspaces already have 0 probability of getting  
 262 output. We define the score function  $u : \mathcal{X}^n \times \mathcal{Y} \rightarrow \mathbb{N}$  as follows.

$$u(x, s) := \begin{cases} |x \cap s| - \sup\{|x \cap t| : t \in \mathcal{S}_d, t \subsetneq s\} & \text{if } s \in \mathcal{S}_d \\ \ell + \frac{4 \log(1/\delta)}{\epsilon} + 1 & \text{if } s = \text{NULL} \end{cases}$$

263 Note that this score function can be computed in finite time because for any  $m$  points and  $i > 0$ , if  
 264 the points are contained in an  $i$ -dimensional subspace, then the subspace that contains all  $m$  points  
 265 must lie within the set of subspaces spanned by  $\binom{m}{i+1}$  subsets of points.

266 We split the proof of Theorem 1.1 into sections for privacy (Lemma 4.2) and accuracy (Lemma 4.4).

### 267 4.1 Privacy

268 **Lemma 4.2.** *Algorithm 1 is  $(\epsilon, \delta)$ -differentially private.*

269 The proof of privacy closely follows the privacy analysis of GAP-MAX by [BDRS18]. The only  
 270 novelty is that Algorithm 1 may output NULL in the case that the input is malformed (i.e., doesn’t  
 271 satisfy the assumptions of Problem 4.1).

272 The key is that the score  $u(X, s)$  is low sensitivity. Thus  $\max\{0, u(X, s) - u(X, s_2) - 1\}$  also has  
 273 low sensitivity. What we gain from subtracting the second-largest score and taking this maximum is  
 274 that these values are also sparse – only one ( $s = s_1$ ) is nonzero. This means we can add noise to all  
 275 the values without paying for composition. We prove the privacy guarantees in Section B.

### 276 4.2 Accuracy

277 We start by showing that the true subspace  $s_*$  has a high score, while the rest of the subspaces have  
 278 low scores.

**Algorithm 1:** DP Exact Subspace Estimator  $\text{DPESSE}_{\varepsilon, \delta, k, \ell}(X)$ **Input:** Samples  $X \in \mathbb{R}^{d \times n}$ . Parameters  $\varepsilon, \delta, k, \ell > 0$ .**Output:**  $\hat{s} \in \mathcal{S}_d^k$ .Set  $\mathcal{Y} \leftarrow \{\text{NULL}\}$  and sample noise  $\xi(\text{NULL})$  from  $\text{TLap}(2, \varepsilon, \delta)$ .Set score  $u(X, \text{NULL}) = \ell + \frac{4 \log(1/\delta)}{\varepsilon} + 1$ .

// Identify candidate outputs.

**For** each subset  $S$  of  $X$  of size  $k$   Let  $s$  be the subspace spanned by  $S$ .   $\mathcal{Y} \leftarrow \mathcal{Y} \cup \{s\}$ .  Sample noise  $\xi(s)$  from  $\text{TLap}(2, \varepsilon, \delta)$ .  Set score  $u(X, s) = |x \cap s| - \sup\{|x \cap t| : t \in \mathcal{S}_d, t \subsetneq s\}$ .

// Apply GAP-MAX.

Let  $s_1 = \arg \max_{s \in \mathcal{Y}} u(X, s)$  be the candidate with the largest score.Let  $s_2 = \arg \max_{s \in \mathcal{Y} \setminus \{s_1\}} u(X, s)$  be the candidate with the second-largest score.Let  $\hat{s} = \arg \max_{s \in \mathcal{Y}} \max\{0, u(X, s) - u(X, s_2) - 1\} + \xi(s)$ .// Truncated Laplace noise  $\xi \sim \text{TLap}(2, \varepsilon, \delta)$ ; see Lemma A.14**Return**  $\hat{s}$ .

279 **Lemma 4.3.** Under the assumptions of Problem 4.1,  $u(x, s_*) \geq n - 2\ell$  and  $u(x, s') \leq 2\ell$  for  
 280  $s' \neq s_*$ .

281 *Proof.* We have  $u(x, s_*) = |x \cap s_*| - |x \cap s'|$  for some  $s' \in \mathcal{S}_d$  with  $s' \subsetneq s_*$ . The dimension of  $s'$   
 282 is at most  $k - 1$  and, by the assumption (ii),  $|x \cap s'| \leq \ell$ .

283 Let  $s' \in \mathcal{S}_d \setminus \{s_*\}$ . There are three cases to analyse:

284 1. Let  $s' \supsetneq s_*$ . Then  $u(x, s') \leq |x \cap s'| - |x \cap s_*| \leq \ell$  because the  $\leq \ell$  adversarial points and  
 285 the  $\geq n - \ell$  non-adversarial points may not together lie in a subspace of dimension  $k$ .

286 2. Let  $s' \subsetneq s_*$ . Let  $k'$  be the dimension of  $s'$ . Clearly  $k' < k$ . By our assumption (ii),  
 287  $|s' \cap x| \leq \ell$ . Then  $u(x, s') = |x \cap s'| - |x \cap t| \leq \ell$  for some  $t$  because the  $\leq \ell$  adversarial  
 288 points already don't lie in  $s_*$ , so they will not lie in any subspace of  $s_*$ .

289 3. Let  $s'$  be incomparable to  $s_*$ . Let  $s'' = s' \cap s_*$ . Then  $u(x, s') \leq |x \cap s'| - |x \cap s''| \leq \ell$   
 290 because the adversarial points may not lie in  $s_*$ , but could be in  $s' \setminus s''$ .

291 This completes the proof. □

292 Now, we show that the algorithm is accurate.

293 **Lemma 4.4.** If  $n \geq 3\ell + \frac{8 \log(1/\delta)}{\varepsilon} + 2$ , then Algorithm 1 outputs  $s_*$  for Problem 4.1.

294 *Proof.* From Lemma 4.3, we know that  $s_*$  has a score of at least  $n - 2\ell$ , and the next best subspace  
 295 can have a score of at most  $\ell$ . Also, the score of NULL is defined to be  $\ell + \frac{4 \log(1/\delta)}{\varepsilon} + 1$ . This means  
 296 that the gap satisfies  $\max\{0, u(X, s_*) - u(X, s_2) - 1\} \geq n - 3\ell - \frac{4 \log(1/\delta)}{\varepsilon} - 1$ . Since the noise is  
 297 bounded by  $\frac{2 \log(1/\delta)}{\varepsilon}$ , our bound on  $n$  implies that  $\hat{s} = s_*$  □

## 298 5 Approximate Case

299 In this section, we discuss the case, where the data “approximately” lies in a  $k$ -dimensional subspace  
 300 of  $\mathbb{R}^d$ . We make a Gaussian distributional assumption, where the covariance is approximately  $k$ -  
 301 dimensional, though the results could be extended to distributions with heavier tails using the right  
 302 inequalities. We formally define the problem:

303 **Problem 5.1.** Let  $\Sigma \in \mathbb{R}^{d \times d}$  be a symmetric matrix with eigenvalues  $\lambda_1 \geq \lambda_2 \geq \dots \geq \lambda_d \geq 0$ .  
 304 Fix  $k \in [d]$  and let  $0 < \gamma \ll 1$ , be such that  $\frac{\lambda_{k+1}}{\lambda_k} \leq \gamma^2$ . Suppose  $\Pi$  is the projection matrix onto  
 305 the subspace spanned by the eigenvectors of  $\Sigma$  corresponding to the eigenvalues  $\lambda_1, \dots, \lambda_k$ . Given  
 306 sample access to  $\mathcal{N}(\vec{0}, \Sigma)$ , and  $0 < \alpha < 1$ , output a projection matrix  $\hat{\Pi}$ , such that  $\|\Pi - \hat{\Pi}\| \leq \alpha$ .

307 We solve Problem 5.1 under the constraint of  $(\varepsilon, \delta)$ -differential privacy. Throughout this section, we  
 308 would refer to the subspace spanned by the top  $k$  eigenvectors of  $\Sigma$  as the “true” or “actual” subspace.

309 Algorithm 2 solves Problem 5.1 and proves Theorem 1.2. Here  $\|\cdot\|$  is the operator norm.

310 **Remark 5.2.** We scale the eigenvalues of  $\Sigma$  so that  $\lambda_k = 1$  and  $\lambda_{k+1} \leq \gamma^2$ . Also, for the purpose  
 311 of the analysis, we will be splitting  $\Sigma = \Sigma_k + \Sigma_{d-k}$ , where  $\Sigma_k$  is the covariance matrix formed by  
 312 the top  $k$  eigenvalues and the corresponding eigenvectors of  $\Sigma$  and  $\Sigma_{d-k}$  is remainder. We assume  
 313 knowledge of  $k$  and (an upper bound on )  $\gamma$ .

314 Algorithm 2 is a type of “Subsample-and-Aggregate” algorithm [NRS07]. We consider multiple  
 315 subspaces, each given by a disjoint subset of the input points which all come from the same multivari-  
 316 ate Gaussian. Our algorithm privately finds a subspace that is close to most of those subspaces. By  
 317 concentration, most of these subspaces will be close to the true subspace, and thus the privately-found  
 318 subspace will also be close to the true subspace.

319 A little more formally, we first sample  $q$  public data points (called “reference points”) from  $\mathcal{N}(\vec{0}, \Sigma)$ .  
 320 Next, we divide the original dataset  $X$  into disjoint datasets of  $m$  samples each, and perform PCA  
 321 on each subset to identify the rank- $k$  subspace that best captures those samples. Then we project  
 322 each of the reference points onto each of the subspaces. Now we have  $t = \frac{q}{m}$  projections of each  
 323 reference point, which we will privately aggregate into a single point. Finally, the aggregated points  
 324 can be used to recover an approximation to the true subspace. To perform the aggregation, we use  
 325 a DP histogram over a partition of  $\mathbb{R}^d$ . Specifically, we randomly partition  $\mathbb{R}^d$  into cells such that,  
 326 with high probability, most the projections will lie within one histogram cell. Thus we can privately  
 327 identify that cell and output a random point from that histogram cell as the aggregated point.

## 328 5.1 Privacy

329 The privacy analysis of our method follows the template of the subsample-and-aggregate framework  
 330 [NRS07] and our privacy guarantee directly follows from that of the DP histogram subroutine.

331 **Lemma 5.3.** *Algorithm 2 is  $(\varepsilon, \delta)$ -differentially private.*

332 *Proof.* Changing one point in  $X$  can change only one of the  $X^j$ ’s. This can only change one point in  
 333  $Q$ , which in turn can only change the counts in two histogram cells by 1. Therefore, the sensitivity  
 334 is 2. Because the sensitivity of the histogram step is bounded by 2 (Lemma 5.3), an application  
 335 of DP-histogram, by Lemma A.15, is  $(\varepsilon, \delta)$ -DP. Outputting a random point in the privately found  
 336 histogram cell preserves privacy by post-processing (Lemma A.12). Hence, the claim.  $\square$

## 337 5.2 Accuracy

338 The accuracy analysis of Algorithm 2 is relatively complex and is deferred to the full version. The  
 339 key ingredients come from the literature on matrix concentration bounds and matrix perturbation  
 340 inequalities. We briefly outline the key steps: First, we apply matrix concentration to show that  
 341 the empirical covariance matrix  $X^j(X^j)^T$  of each subsample is, after rescaling, close to the true  
 342 covariance matrix  $\Sigma$  with high probability. Second, we apply matrix perturbation inequalities to show  
 343 that the top- $k$  subspace  $\Pi_j$  corresponding to the empirical covariance matrix  $X^j(X^j)^T$  is close to  
 344 the true top- $k$  subspace  $\Pi$ . It follows that most of the the projected reference points  $p_i^j$  are close to  
 345 the desired value  $\Pi p_i$ . Third, we show that the aggregated projections  $\hat{p}_i$  are also close to the true  
 346 projections  $\Pi p_i$ . Finally, we apply matrix perturbation inequalities again to show that the subspace  
 347 derived from the aggregated projections  $\hat{\Pi}$  is close to the true subspace  $\Pi$ .

## 348 6 Conclusion, Discussion, & Limitations of Our Work

349 We provide algorithms for the problem of privately learning subspaces where the sample complexity  
 350 does not depend on the ambient dimension. This is the first time such results have been given and,



|                                                                                                                                                                                                                                                                                                                                                                                                                                                                                                                                                                                                                                                                                                                                                                                                                                                                                                                                                                                                                                                                                                                                                                                                                                                                                                                                                                                                                                                                                                                                                                                                                                                                                                                                                                                                                                                                                                                                                                                                                                                                                                                                                                                                                                                                                                                                                                                                                                                                                                                                                                                                                                                                                                                                                                                                                                                                                                                                                                                                                                                                                                                                 |
|---------------------------------------------------------------------------------------------------------------------------------------------------------------------------------------------------------------------------------------------------------------------------------------------------------------------------------------------------------------------------------------------------------------------------------------------------------------------------------------------------------------------------------------------------------------------------------------------------------------------------------------------------------------------------------------------------------------------------------------------------------------------------------------------------------------------------------------------------------------------------------------------------------------------------------------------------------------------------------------------------------------------------------------------------------------------------------------------------------------------------------------------------------------------------------------------------------------------------------------------------------------------------------------------------------------------------------------------------------------------------------------------------------------------------------------------------------------------------------------------------------------------------------------------------------------------------------------------------------------------------------------------------------------------------------------------------------------------------------------------------------------------------------------------------------------------------------------------------------------------------------------------------------------------------------------------------------------------------------------------------------------------------------------------------------------------------------------------------------------------------------------------------------------------------------------------------------------------------------------------------------------------------------------------------------------------------------------------------------------------------------------------------------------------------------------------------------------------------------------------------------------------------------------------------------------------------------------------------------------------------------------------------------------------------------------------------------------------------------------------------------------------------------------------------------------------------------------------------------------------------------------------------------------------------------------------------------------------------------------------------------------------------------------------------------------------------------------------------------------------------------|
| <p><b>Algorithm 2:</b> DP Approximate Subspace Estimator <math>\text{DPASE}_{\varepsilon, \delta, \alpha, \gamma, k}(X)</math></p> <p><b>Input:</b> Samples <math>X_1, \dots, X_n \in \mathbb{R}^d</math>. Parameters <math>\varepsilon, \delta, \alpha, \gamma, k &gt; 0</math>.</p> <p><b>Output:</b> Projection matrix <math>\widehat{\Pi} \in \mathbb{R}^{d \times d}</math> of rank <math>k</math>.</p> <p>Set parameters: <math>t \leftarrow \frac{C_0 \ln(1/\delta)}{\varepsilon}</math>    <math>m \leftarrow \lfloor n/t \rfloor</math>    <math>q \leftarrow C_1 k</math>    <math>\ell \leftarrow \frac{C_2 \gamma \sqrt{dk}(\sqrt{k} + \sqrt{\ln(kt)})}{\sqrt{m}}</math></p> <p>Sample reference points <math>p_1, \dots, p_q</math> from <math>\mathcal{N}(\vec{0}, \mathbb{I})</math> independently.</p> <p>// Subsample from <math>X</math>, and form projection matrices.</p> <p><b>For</b> <math>j \in 1, \dots, t</math></p> <p>    Let <math>X^j = (X_{(j-1)m+1}, \dots, X_{jm}) \in \mathbb{R}^{d \times m}</math>.</p> <p>    Let <math>\Pi_j \in \mathbb{R}^{d \times d}</math> be the projection matrix onto the subspace spanned by the eigenvectors of <math>X^j (X^j)^T \in \mathbb{R}^{d \times d}</math> corresponding to the largest <math>k</math> eigenvalues.</p> <p>    <b>For</b> <math>i \in 1, \dots, q</math></p> <p>        <math>p_i^j \leftarrow \Pi_j p_i</math></p> <p>// Create histogram cells with random offset.</p> <p>Let <math>\lambda</math> be a random number in <math>[0, 1)</math>.</p> <p>Divide <math>\mathbb{R}^{qd}</math> into <math>\Omega = \{\dots, [\lambda\ell + i\ell, \lambda\ell + (i+1)\ell), \dots\}^{qd}</math>, for all <math>i \in \mathbb{Z}</math>.</p> <p>Let each disjoint cell of length <math>\ell</math> be a histogram bucket.</p> <p>// Perform private aggregation of subspaces.</p> <p>For each <math>i \in [q]</math>, let <math>Q_i \in \mathbb{R}^{d \times t}</math> be the dataset, where column <math>j</math> is <math>p_i^j</math>.</p> <p>Let <math>Q \in \mathbb{R}^{qd \times t}</math> be the vertical concatenation of all <math>Q_i</math>'s in order.</p> <p>Run <math>(\varepsilon, \delta)</math>-DP histogram over <math>\Omega</math> using <math>Q</math> to get <math>\omega \in \Omega</math> that contains at least <math>\frac{t}{2}</math> points.</p> <p><b>If</b> no such <math>\omega</math> exists</p> <p>    <b>Return</b> <math>\perp</math></p> <p>// Return the subspace.</p> <p>Let <math>\widehat{p} = (\widehat{p}_1, \dots, \widehat{p}_d, \dots, \widehat{p}_{(q-1)d+1}, \dots, \widehat{p}_{qd})</math> be a random point in <math>\omega</math>.</p> <p><b>For</b> each <math>i \in [q]</math></p> <p>    Let <math>\widehat{p}_i = (\widehat{p}_{(i-1)d+1}, \dots, \widehat{p}_{id}) \in \mathbb{R}^d</math>.</p> <p>Let <math>\widehat{\Pi}</math> be the projection matrix onto the subspace spanned by the eigenvectors corresponding to the <math>k</math> largest eigenvalues of <math>\sum_{i=1}^q \widehat{p}_i \widehat{p}_i^T</math>.</p> <p><b>Return</b> <math>\widehat{\Pi}</math>.</p> |
|---------------------------------------------------------------------------------------------------------------------------------------------------------------------------------------------------------------------------------------------------------------------------------------------------------------------------------------------------------------------------------------------------------------------------------------------------------------------------------------------------------------------------------------------------------------------------------------------------------------------------------------------------------------------------------------------------------------------------------------------------------------------------------------------------------------------------------------------------------------------------------------------------------------------------------------------------------------------------------------------------------------------------------------------------------------------------------------------------------------------------------------------------------------------------------------------------------------------------------------------------------------------------------------------------------------------------------------------------------------------------------------------------------------------------------------------------------------------------------------------------------------------------------------------------------------------------------------------------------------------------------------------------------------------------------------------------------------------------------------------------------------------------------------------------------------------------------------------------------------------------------------------------------------------------------------------------------------------------------------------------------------------------------------------------------------------------------------------------------------------------------------------------------------------------------------------------------------------------------------------------------------------------------------------------------------------------------------------------------------------------------------------------------------------------------------------------------------------------------------------------------------------------------------------------------------------------------------------------------------------------------------------------------------------------------------------------------------------------------------------------------------------------------------------------------------------------------------------------------------------------------------------------------------------------------------------------------------------------------------------------------------------------------------------------------------------------------------------------------------------------------|

351 as discussed in §2.1, prior work in the general area of private matrix analysis uses techniques that  
352 fundamentally cannot achieve sample complexity that is independent of the ambient dimension.

353 To achieve dimension-independent sample complexity, we must make strong assumptions about  
354 the data. Specifically, we must assume that the data points lie in or very near to a low-dimensional  
355 subspace. This is a limitation of our work. However, we emphasize that such assumptions are  
356 necessary to obtain dimension-independent sample complexity *even in the non-private setting* [CZ16].

357 We believe that the specific parameters in our results can be improved. We conjecture that the  $\gamma^2$   
358 parameter in Theorem 1.2 (which controls the eigenvalue gap) can be improved. Specifically, the  
359 exponent on the ambient dimension  $d$  seems like it could be improved. (Although we know that it  
360 cannot be eliminated entirely.)

361 Our eigenvalue gap assumption could also be relaxed – rather than requiring a gap between  $\lambda_k$  and  
362  $\lambda_{k+1}$ , we could require a gap between  $\lambda_k$  and  $\lambda_{k+\ell}$ . However, this would require changing other  
363 aspects of the problem formulation.

364 We hope that our work inspires further work. Generally, we believe that exploiting structure in the  
365 data to avoid privacy’s curse of dimensionality is a fruitful and valuable research direction.

366 **References**

- 367 [ABU18] R. Arora, V. Braverman, and J. Upadhyay. “Differentially private robust low-rank  
368 approximation”. In: *Advances in neural information processing systems* (2018)  
369 (cit. on p. 4).
- 370 [ACGMMTZ16] M. Abadi, A. Chu, I. Goodfellow, H. B. McMahan, I. Mironov, K. Talwar,  
371 and L. Zhang. “Deep learning with differential privacy”. In: *Proceedings of the*  
372 *2016 ACM SIGSAC conference on computer and communications security*. 2016,  
373 pp. 308–318 (cit. on p. 1).
- 374 [ADKMV18] K. Amin, T. Dick, A. Kulesza, A. M. Medina, and S. Vassilvitskii. “Private co-  
375 variance estimation via iterative eigenvector sampling”. In: *2018 NIPS workshop*  
376 *in Privacy-Preserving Machine Learning*. Vol. 250. 2018 (cit. on p. 4).
- 377 [BBDS12] J. Blocki, A. Blum, A. Datta, and O. Sheffet. “The Johnson-Lindenstrauss Trans-  
378 form Itself Preserves Differential Privacy”. In: *Proceedings of the 53rd Annual*  
379 *IEEE Symposium on Foundations of Computer Science*. FOCS ’12. Washington,  
380 DC, USA: IEEE Computer Society, 2012, pp. 410–419 (cit. on p. 4).
- 381 [BBNS19] J. Błasiok, M. Bun, A. Nikolov, and T. Steinke. “Towards instance-optimal private  
382 query release”. In: *Proceedings of the Thirtieth Annual ACM-SIAM Symposium*  
383 *on Discrete Algorithms*. SIAM. 2019, pp. 2480–2497 (cit. on p. 1).
- 384 [BCMNUW20] R. Bassily, A. Cheu, S. Moran, A. Nikolov, J. Ullman, and S. Wu. “Private  
385 query release assisted by public data”. In: *International Conference on Machine*  
386 *Learning*. PMLR. 2020, pp. 695–703 (cit. on p. 1).
- 387 [BDMN05] A. Blum, C. Dwork, F. McSherry, and K. Nissim. “Practical Privacy: The SuLQ  
388 Framework”. In: *Proceedings of the 24th ACM SIGMOD-SIGACT-SIGART Sym-*  
389 *posium on Principles of Database Systems*. PODS ’05. New York, NY, USA:  
390 ACM, 2005, pp. 128–138 (cit. on p. 4).
- 391 [BDRS18] M. Bun, C. Dwork, G. N. Rothblum, and T. Steinke. “Composable and Versatile  
392 Privacy via Truncated CDP”. In: *Proceedings of the 50th Annual ACM Symposium*  
393 *on the Theory of Computing*. STOC ’18. New York, NY, USA: ACM, 2018, pp. 74–  
394 86 (cit. on pp. 5, 6, 17).
- 395 [BLR08] A. Blum, K. Ligett, and A. Roth. “A Learning Theory Approach to Non-  
396 Interactive Database Privacy”. In: *STOC*. 2008 (cit. on p. 1).
- 397 [BNS16] M. Bun, K. Nissim, and U. Stemmer. “Simultaneous Private Learning of Multiple  
398 Concepts”. In: *Proceedings of the 7th Conference on Innovations in Theoretical*  
399 *Computer Science*. ITCS ’16. New York, NY, USA: ACM, 2016, pp. 369–380  
400 (cit. on p. 17).
- 401 [BS16] M. Bun and T. Steinke. “Concentrated Differential Privacy: Simplifications, Ex-  
402 tensions, and Lower Bounds”. In: *Proceedings of the 14th Conference on Theory*  
403 *of Cryptography*. TCC ’16-B. Berlin, Heidelberg: Springer, 2016, pp. 635–658  
404 (cit. on p. 4).
- 405 [BUV14] M. Bun, J. Ullman, and S. Vadhan. “Fingerprinting Codes and the Price of  
406 Approximate Differential Privacy”. In: *Proceedings of the 46th Annual ACM*  
407 *Symposium on the Theory of Computing*. STOC ’14. New York, NY, USA: ACM,  
408 2014, pp. 1–10 (cit. on p. 1).
- 409 [CSS12] K. Chaudhuri, A. Sarwate, and K. Sinha. “Near-optimal differentially private  
410 principal components”. In: *Advances in Neural Information Processing Systems*  
411 25 (2012), pp. 989–997 (cit. on p. 4).
- 412 [CZ16] T. Cai and A. Zhang. “Rate-Optimal Perturbation Bounds for Singular Subspaces  
413 with Applications to High-Dimensional Statistics”. In: *The Annals of Statistics* 46  
414 (May 2016) (cit. on pp. 3, 9, 14).
- 415 [DMNS06] C. Dwork, F. McSherry, K. Nissim, and A. Smith. “Calibrating Noise to Sensitivity  
416 in Private Data Analysis”. In: *Proceedings of the 3rd Conference on Theory of*  
417 *Cryptography*. TCC ’06. Berlin, Heidelberg: Springer, 2006, pp. 265–284 (cit. on  
418 p. 16).

- 419 [DSSUV15] C. Dwork, A. Smith, T. Steinke, J. Ullman, and S. Vadhan. “Robust Traceability  
420 from Trace Amounts”. In: *Proceedings of the 56th Annual IEEE Symposium  
421 on Foundations of Computer Science*. FOCS ’15. Washington, DC, USA: IEEE  
422 Computer Society, 2015, pp. 650–669 (cit. on p. 1).
- 423 [DTTZ14] C. Dwork, K. Talwar, A. Thakurta, and L. Zhang. “Analyze Gauss: Optimal  
424 Bounds for Privacy-Preserving Principal Component Analysis”. In: *Proceedings  
425 of the 46th Annual ACM Symposium on the Theory of Computing*. STOC ’14.  
426 New York, NY, USA: ACM, 2014, pp. 11–20 (cit. on p. 4).
- 427 [FT20] Y. Feng and Y. Tu. “How neural networks find generalizable solutions: Self-tuned  
428 annealing in deep learning”. In: *arXiv preprint arXiv:2001.01678* (2020) (cit. on  
429 p. 1).
- 430 [GARD18] G. Gur-Ari, D. A. Roberts, and E. Dyer. “Gradient descent happens in a tiny  
431 subspace”. In: *arXiv preprint arXiv:1812.04754* (2018) (cit. on p. 1).
- 432 [GDGK20] Q. Geng, W. Ding, R. Guo, and S. Kumar. “Tight Analysis of Privacy and Utility  
433 Tradeoff in Approximate Differential Privacy”. In: *Proceedings of the Twenty  
434 Third International Conference on Artificial Intelligence and Statistics*. Ed. by S.  
435 Chiappa and R. Calandra. Vol. 108. Proceedings of Machine Learning Research.  
436 PMLR, 2020, pp. 89–99 (cit. on p. 17).
- 437 [GGB18] A. Gonem and R. Gilad-Bachrach. “Smooth Sensitivity Based Approach for  
438 Differentially Private PCA”. In: *Algorithmic Learning Theory*. ALT ’18. JMLR,  
439 Inc., 2018, pp. 438–450 (cit. on p. 4).
- 440 [HP13] M. Hardt and E. Price. “The noisy power method: A meta algorithm with applica-  
441 tions”. In: *arXiv preprint arXiv:1311.2495* (2013) (cit. on p. 4).
- 442 [HR10] M. Hardt and G. N. Rothblum. “A multiplicative weights mechanism for privacy-  
443 preserving data analysis”. In: *2010 IEEE 51st Annual Symposium on Foundations  
444 of Computer Science*. IEEE, 2010, pp. 61–70 (cit. on p. 1).
- 445 [HR12] M. Hardt and A. Roth. “Beating randomized response on incoherent matrices”. In:  
446 *Proceedings of the forty-fourth annual ACM symposium on Theory of computing*.  
447 2012, pp. 1255–1268 (cit. on p. 4).
- 448 [HR13] M. Hardt and A. Roth. “Beyond worst-case analysis in private singular vector  
449 computation”. In: *Proceedings of the forty-fifth annual ACM symposium on Theory  
450 of computing*. 2013, pp. 331–340 (cit. on p. 4).
- 451 [HT10] M. Hardt and K. Talwar. “On the Geometry of Differential Privacy”. In: *Proceed-  
452 ings of the 42nd Annual ACM Symposium on the Theory of Computing*. STOC  
453 ’10. New York, NY, USA: ACM, 2010, pp. 705–714 (cit. on pp. 1, 4).
- 454 [KRRT20] P. Kairouz, M. Riberro, K. Rush, and A. Thakurta. *Fast Dimension Independent  
455 Private AdaGrad on Publicly Estimated Subspaces*. 2020 (cit. on p. 1).
- 456 [KT13] M. Kapralov and K. Talwar. “On Differentially Private Low Rank Approxima-  
457 tion”. In: *Proceedings of the 24th Annual ACM-SIAM Symposium on Discrete  
458 Algorithms*. SODA ’13. Philadelphia, PA, USA: SIAM, 2013, pp. 1395–1414  
459 (cit. on p. 4).
- 460 [LFLY18] C. Li, H. Farkhoor, R. Liu, and J. Yosinski. “Measuring the intrinsic dimension of  
461 objective landscapes”. In: *arXiv preprint arXiv:1804.08838* (2018) (cit. on p. 1).
- 462 [LGZCB20] X. Li, Q. Gu, Y. Zhou, T. Chen, and A. Banerjee. “Hessian based analysis of sgd  
463 for deep nets: Dynamics and generalization”. In: *Proceedings of the 2020 SIAM  
464 International Conference on Data Mining*. SIAM, 2020, pp. 190–198 (cit. on  
465 p. 1).
- 466 [LXTSG17] H. Li, Z. Xu, G. Taylor, C. Studer, and T. Goldstein. “Visualizing the loss land-  
467 scape of neural nets”. In: *arXiv preprint arXiv:1712.09913* (2017) (cit. on p. 1).
- 468 [MM09] F. McSherry and I. Mironov. “Differentially private recommender systems: Build-  
469 ing privacy into the netflix prize contenders”. In: *Proceedings of the 15th ACM  
470 SIGKDD international conference on Knowledge discovery and data mining*.  
471 2009, pp. 627–636 (cit. on p. 4).
- 472 [MT07] F. McSherry and K. Talwar. “Mechanism Design via Differential Privacy”. In:  
473 *Proceedings of the 48th Annual IEEE Symposium on Foundations of Computer Sci-  
474 ence*. FOCS ’07. Washington, DC, USA: IEEE Computer Society, 2007, pp. 94–  
475 103 (cit. on p. 4).

476 [NRS07] K. Nissim, S. Raskhodnikova, and A. Smith. “Smooth Sensitivity and Sampling  
477 in Private Data Analysis”. In: *Proceedings of the 39th Annual ACM Symposium  
478 on the Theory of Computing*. STOC ’07. New York, NY, USA: ACM, 2007,  
479 pp. 75–84 (cit. on pp. 3–5, 8).

480 [NS06] A. Narayanan and V. Shmatikov. “How to break anonymity of the netflix prize  
481 dataset”. In: *arXiv preprint cs/0610105* (2006) (cit. on p. 3).

482 [She19] O. Sheffet. “Old techniques in differentially private linear regression”. In: *Algo-  
483 rithmic Learning Theory*. PMLR. 2019, pp. 789–827 (cit. on p. 4).

484 [SU17] T. Steinke and J. Ullman. “Between Pure and Approximate Differential Privacy”.  
485 In: *The Journal of Privacy and Confidentiality* 7.2 (2017), pp. 3–22 (cit. on p. 1).

486 [Ull15] J. Ullman. “Private multiplicative weights beyond linear queries”. In: *Proceedings  
487 of the 34th ACM SIGMOD-SIGACT-SIGAI Symposium on Principles of Database  
488 Systems*. 2015, pp. 303–312 (cit. on p. 1).

489 [Vad17] S. Vadhan. “The Complexity of Differential Privacy”. In: *Tutorials on the Foun-  
490 dations of Cryptography: Dedicated to Oded Goldreich*. Ed. by Y. Lindell. Cham,  
491 Switzerland: Springer International Publishing AG, 2017. Chap. 7, pp. 347–450  
492 (cit. on p. 17).

493 [Ver18] R. Vershynin. *High-Dimensional Probability: An Introduction with Applications  
494 in Data Science*. Cambridge Series in Statistical and Probabilistic Mathematics.  
495 Cambridge University Press, 2018 (cit. on p. 15).

496 [WSCHT16] L. Wei, A. D. Sarwate, J. Corander, A. Hero, and V. Tarokh. “Analysis of a  
497 privacy-preserving PCA algorithm using random matrix theory”. In: *2016 IEEE  
498 Global Conference on Signal and Information Processing (GlobalSIP)*. IEEE.  
499 2016, pp. 1335–1339 (cit. on p. 4).

500 [ZWB20] Y. Zhou, Z. S. Wu, and A. Banerjee. “Bypassing the ambient dimension: Private  
501 sgd with gradient subspace identification”. In: *arXiv preprint arXiv:2007.03813*  
502 (2020) (cit. on p. 1).

## 503 Checklist

- 504 1. For all authors...
- 505 (a) Do the main claims made in the abstract and introduction accurately reflect the paper’s  
506 contributions and scope? [Yes]
- 507 (b) Did you describe the limitations of your work? [Yes]
- 508 (c) Did you discuss any potential negative societal impacts of your work? [N/A]
- 509 (d) Have you read the ethics review guidelines and ensured that your paper conforms to  
510 them? [Yes]
- 511 2. If you are including theoretical results...
- 512 (a) Did you state the full set of assumptions of all theoretical results? [Yes]
- 513 (b) Did you include complete proofs of all theoretical results? [Yes]
- 514 3. If you ran experiments...
- 515 (a) Did you include the code, data, and instructions needed to reproduce the main experi-  
516 mental results (either in the supplemental material or as a URL)? [N/A]
- 517 (b) Did you specify all the training details (e.g., data splits, hyperparameters, how they  
518 were chosen)? [N/A]
- 519 (c) Did you report error bars (e.g., with respect to the random seed after running experi-  
520 ments multiple times)? [N/A]
- 521 (d) Did you include the total amount of compute and the type of resources used (e.g., type  
522 of GPUs, internal cluster, or cloud provider)? [N/A]
- 523 4. If you are using existing assets (e.g., code, data, models) or curating/releasing new assets...
- 524 (a) If your work uses existing assets, did you cite the creators? [N/A]
- 525 (b) Did you mention the license of the assets? [N/A]
- 526 (c) Did you include any new assets either in the supplemental material or as a URL? [N/A]
- 527

528 (d) Did you discuss whether and how consent was obtained from people whose data you're  
529 using/curating? [N/A]

530 (e) Did you discuss whether the data you are using/curating contains personally identifiable  
531 information or offensive content? [N/A]

532 5. If you used crowdsourcing or conducted research with human subjects...

533 (a) Did you include the full text of instructions given to participants and screenshots, if  
534 applicable? [N/A]

535 (b) Did you describe any potential participant risks, with links to Institutional Review  
536 Board (IRB) approvals, if applicable? [N/A]

537 (c) Did you include the estimated hourly wage paid to participants and the total amount  
538 spent on participant compensation? [N/A]

539 **Appendix**

540 **A Notations, Definitions, and Background Results**

541 **A.1 Linear Algebra and Probability Preliminaries**

542 Here, we mention a few key technical results that we will be using to prove the main theorem for  
 543 the approximate case. Throughout this document, we assume that the dimension  $d$  is larger than  
 544 some absolute constant, and adopt the following notation: for a matrix  $A$  of rank  $r$ , we use  $s_1(A) \geq$   
 545  $\dots \geq s_r(A)$  to denote the singular values of  $A$  in decreasing order, and use  $\lambda_1(A) \geq \dots \geq \lambda_r(A)$  to  
 546 denote the eigenvalues of  $A$  in decreasing order; let  $s_{\min}(A)$  denote the least, non-zero singular value  
 547 of  $A$ . We omit the parentheses when the context is clear. We begin by stating two results about matrix  
 548 perturbation theory. The first result says that if two matrices are close to one another in operator  
 549 norm, then their corresponding singular values are also close to one another.

550 Define

$$\|M\| := \sup\{\|Mx\|_2 : x \in \mathbb{R}^d, \|x\|_2 \leq 1\}$$

551 to be the operator norm with respect to the Euclidean vector norm.

**Lemma A.1** (Singular Value Inequality). *Let  $A, B \in \mathbb{R}^{d \times n}$  and let  $r = \min\{d, n\}$ . Then for  $1 \leq i, j \leq r$ ,*

$$s_{i+j-1}(A+B) \leq s_i(A) + s_j(B).$$

552 The following result gives a lower bound on the least singular value of sum of two matrices.

**Lemma A.2** (Least Singular Value of Matrix Sum). *Let  $A, B \in \mathbb{R}^{d \times n}$ . Then*

$$s_{\min}(A+B) \geq s_{\min}(A) - \|B\|.$$

The next result bounds the angle between the subspaces spanned by two matrices that are close to one another. Let  $X \in \mathbb{R}^{d \times n}$  have the following SVD.

$$X = [U \quad U_{\perp}] \cdot \begin{bmatrix} \Sigma_1 & 0 \\ 0 & \Sigma_2 \end{bmatrix} \cdot \begin{bmatrix} V^T \\ V_{\perp}^T \end{bmatrix}$$

In the above,  $U, U_{\perp}$  are orthonormal matrices such that  $U \in \mathbb{R}^{d \times r}$  and  $U_{\perp} \in \mathbb{R}^{d \times (d-r)}$ ,  $\Sigma_1, \Sigma_2$  are diagonal matrices, such that  $\Sigma_1 \in \mathbb{R}^{r \times r}$  and  $\Sigma_2 \in \mathbb{R}^{(d-r) \times (n-r)}$ , and  $V, V_{\perp}$  are orthonormal matrices, such that  $V \in \mathbb{R}^{n \times r}$  and  $V_{\perp} \in \mathbb{R}^{n \times (n-r)}$ . Let  $Z \in \mathbb{R}^{d \times n}$  be a perturbation matrix, and  $\hat{X} = X + Z$ , such that  $\hat{X}$  has the following SVD.

$$\hat{X} = [\hat{U} \quad \hat{U}_{\perp}] \cdot \begin{bmatrix} \hat{\Sigma}_1 & 0 \\ 0 & \hat{\Sigma}_2 \end{bmatrix} \cdot \begin{bmatrix} \hat{V}^T \\ \hat{V}_{\perp}^T \end{bmatrix}$$

553 In the above,  $\hat{U}, \hat{U}_{\perp}, \hat{\Sigma}_1, \hat{\Sigma}_2, \hat{V}, \hat{V}_{\perp}$  have the same structures as  $U, U_{\perp}, \Sigma_1, \Sigma_2, V, V_{\perp}$  respectively.  
 554 Let  $Z_{21} = \hat{U}_{\perp} \hat{U}_{\perp}^T Z V V^T$  and  $Z_{12} = U U^T Z V_{\perp} V_{\perp}^T$ . Suppose  $\sigma_1 \geq \dots \geq \sigma_r \geq 0$  are the singular  
 555 values of  $U^T \hat{U}$ . Let  $\Theta(U, \hat{U}) \in \mathbb{R}^{r \times r}$  be a diagonal matrix, such that  $\Theta_{ii}(U, \hat{U}) = \cos^{-1}(\sigma_i)$ .

**Lemma A.3** (Sin( $\Theta$ ) Theorem [CZ16]). *Let  $X, \hat{X}, Z, Z_{12}, Z_{21}$  be defined as above. Denote  $\alpha = s_{\min}(U^T \hat{X} V)$  and  $\beta = \|U_{\perp}^T \hat{X} V_{\perp}\|$ . If  $\alpha^2 > \beta^2 + \min\{\|Z_{12}\|^2, \|Z_{21}\|^2\}$ , then we have the following.*

$$\|\text{Sin}(\Theta)(U, \hat{U})\| \leq \frac{\alpha \|Z_{21}\| + \beta \|Z_{12}\|}{\alpha^2 - \beta^2 - \min\{\|Z_{12}\|^2, \|Z_{21}\|^2\}}$$

556 The next result bounds  $\|\text{Sin}(\Theta)(U, \hat{U})\|$  in terms of the distance between  $U U^T$  and  $\hat{U} \hat{U}^T$ .

**Lemma A.4** (Property of  $\|\text{Sin}(\Theta)\|$  [CZ16]). *Let  $U, \hat{U} \in \mathbb{R}^{d \times r}$  be orthonormal matrices, and let  $\Theta(U, \hat{U})$  be defined as above in terms of  $\hat{U}, U$ . Then we have the following.*

$$\|\text{Sin}(\Theta)(U, \hat{U})\| \leq \|\hat{U} \hat{U}^T - U U^T\| \leq 2 \|\text{Sin}(\Theta)(U, \hat{U})\|$$

557 The next result bounds the singular values of a matrix, whose columns are independent vectors from a  
 558 mean zero, isotropic distribution in  $\mathbb{R}^d$ . We first define the sub-Gaussian norm of a random variable.

**Definition A.5.** Let  $X$  be a sub-Gaussian random variable. The sub-Gaussian norm of  $X$ , denoted by  $\|X\|_{\psi^2}$ , is defined as,

$$\|X\|_{\psi^2} = \inf\{t > 0 : \mathbb{E}[\exp(X^2/t^2)] \leq 2\}.$$

**Lemma A.6** (Theorem 4.6.1 [Ver18]). *Let  $A$  be an  $n \times m$  matrix, whose columns  $A_i$  are independent, mean zero, sub-Gaussian isotropic random vectors in  $\mathbb{R}^n$ . Then for any  $t \geq 0$ , we have*

$$\sqrt{m} - CK^2(\sqrt{n} + t) \leq s_n(A) \leq s_1(A) \leq \sqrt{m} + CK^2(\sqrt{n} + t)$$

559 *with probability at least  $1 - 2\exp(-t^2)$ . Here,  $K = \max_i \|A_i\|_{\psi^2}$  (sub-Gaussian norm of  $A$ ).*

560 In the above,  $\|A\|_{\psi^2} \in O(1)$  if the distribution in question is  $\mathcal{N}(\vec{0}, \mathbb{I})$ . The following corollary  
561 generalises the above result for arbitrary Gaussians.

**Corollary A.7.** *Let  $A$  be an  $n \times m$  matrix, whose columns  $A_i$  are independent, random vectors in  $\mathbb{R}^n$  from  $\mathcal{N}(\vec{0}, \Sigma)$ . Then for any  $t \geq 0$ , we have*

$$(\sqrt{m} - CK^2(\sqrt{n} + t))\sqrt{s_n(\Sigma)} \leq s_n(A) \leq (\sqrt{m} + CK^2(\sqrt{n} + t))\sqrt{s_n(\Sigma)}$$

and

$$s_1(A) \leq (\sqrt{m} + CK^2(\sqrt{n} + t))\sqrt{s_1(\Sigma)}$$

562 *with probability at least  $1 - 2\exp(-t^2)$ . Here,  $K = \max_i \|A_i\|_{\psi^2}$  (sub-Gaussian norm of  $A$ ).*

563 *Proof.* First, we prove the lower bound on  $s_n(A)$ . Note that  $s_n(A) = \min_{\|x\|>0} \frac{\|Ax\|}{\|x\|}$ , and that the

564 columns of  $\Sigma^{-\frac{1}{2}}A$  are distributed as  $\mathcal{N}(\vec{0}, \mathbb{I})$ . Therefore, we have the following.

$$\begin{aligned} \min_{\|x\|>0} \frac{\|Ax\|}{\|x\|} &= \min_{\|x\|>0} \frac{\|\Sigma^{\frac{1}{2}}\Sigma^{-\frac{1}{2}}Ax\|}{\|x\|} \\ &= \min_{\|x\|>0} \frac{\|\Sigma^{\frac{1}{2}}\Sigma^{-\frac{1}{2}}Ax\|}{\|\Sigma^{-\frac{1}{2}}Ax\|} \frac{\|\Sigma^{-\frac{1}{2}}Ax\|}{\|x\|} \\ &\geq \min_{\|x\|>0} \frac{\|\Sigma^{\frac{1}{2}}\Sigma^{-\frac{1}{2}}Ax\|}{\|\Sigma^{-\frac{1}{2}}Ax\|} \min_{\|x\|>0} \frac{\|\Sigma^{-\frac{1}{2}}Ax\|}{\|x\|} \\ &\geq \min_{\|y\|>0} \frac{\|\Sigma^{\frac{1}{2}}y\|}{\|y\|} \min_{\|x\|>0} \frac{\|\Sigma^{-\frac{1}{2}}Ax\|}{\|x\|} \\ &\geq (\sqrt{m} - CK^2(\sqrt{n} + t))\sqrt{s_n(\Sigma)} \end{aligned} \quad (\text{Lemma A.6})$$

565 Next, we prove the upper bound on  $s_n(A)$ . For this, we first show that for  $X \in \mathbb{R}^{m \times d}$  and  $Y \in \mathbb{R}^{d \times n}$ ,

566  $s_{\min}(XY) \leq s_{\min}(X) \cdot \|Y\|.$

$$\begin{aligned} s_{\min}(XY) &= \min_{\|z\|=1} \|XYZ\| \\ &\leq \min_{\|z\|=1} \|X\| \|Yz\| \\ &= \|X\| \cdot \min_{\|z\|=1} \|Yz\| \\ &= \|X\| \cdot s_{\min}(Y) \end{aligned}$$

567 Now,  $s_{\min}(XY) = s_{\min}(Y^T X^T) \leq \|Y\| \cdot s_{\min}(X)$  by the above reasoning. Using this results, we  
568 have the following.

$$\begin{aligned} s_n(A) &= s_n(\Sigma^{1/2} \cdot \Sigma^{-1/2} A) \\ &\leq s_n(\Sigma^{1/2}) \|\Sigma^{-1/2} A\| \\ &\leq (\sqrt{m} + CK^2(\sqrt{n} + t))\sqrt{s_n(\Sigma)} \end{aligned} \quad (\text{Lemma A.6})$$

569 Now, we show the upper bound on  $s_1(A)$ . Note that  $s_1(A) = \|A\|.$

$$\begin{aligned} \|A\| &= \|\Sigma^{\frac{1}{2}}\Sigma^{-\frac{1}{2}}A\| \\ &\leq \|\Sigma^{\frac{1}{2}}\| \cdot \|\Sigma^{-\frac{1}{2}}A\| \\ &\leq (\sqrt{m} + CK^2(\sqrt{n} + t))\sqrt{s_1(\Sigma)} \end{aligned} \quad (\text{Lemma A.6})$$

570 This completes the proof.  $\square$

571 Now, we state a concentration inequality for  $\chi^2$  random variables.

**Lemma A.8.** *Let  $X$  be a  $\chi^2$  random variable with  $k$  degrees of freedom. Then,*

$$\mathbb{P}\left[X > k + 2\sqrt{kt} + 2t\right] \leq e^{-t}.$$

572 Next, we state the well-known Bernstein's inequality for sums of independent Bernoulli random  
573 variables.

**Lemma A.9** (Bernstein's Inequality). *Let  $X_1, \dots, X_m$  be independent Bernoulli random variables taking values in  $\{0, 1\}$ . Let  $p = \mathbb{E}[X_i]$ . Then for  $m \geq \frac{5p}{2\varepsilon^2} \ln(2/\beta)$  and  $\varepsilon \leq p/4$ ,*

$$\mathbb{P}\left[\left|\frac{1}{m} \sum X_i - p\right| \geq \varepsilon\right] \leq 2e^{-\varepsilon^2 m/2(p+\varepsilon)} \leq \beta.$$

574 We finally state a result about the norm of a vector sampled from  $\mathcal{N}(\vec{0}, \mathbb{I})$ .

**Lemma A.10.** *Let  $X_1, \dots, X_q \sim \mathcal{N}(\vec{0}, \Sigma)$  be vectors in  $\mathbb{R}^d$ , where  $\Sigma$  is the projection of  $\mathbb{I}_{d \times d}$  on to a subspace of  $\mathbb{R}^d$  of rank  $k$ . Then*

$$\mathbb{P}\left[\forall i, \|X_i\|^2 \leq k + 2\sqrt{kt} + 2t\right] \geq 1 - qe^{-t}.$$

575 *Proof.* Since  $\Sigma$  is of rank  $k$ , we can directly use Lemma A.8 for a fixed  $i \in [q]$ , and the union bound  
576 over all  $i \in [q]$  to get the required result. This is because for any  $i$ ,  $\|X_i\|^2$  is a  $\chi^2$  random variable  
577 with  $k$  degrees of freedom.  $\square$

## 578 A.2 Privacy Preliminaries

**Definition A.11** (Differential Privacy (DP) [DMNS06]). A randomized algorithm  $M : \mathcal{X}^n \rightarrow \mathcal{Y}$  satisfies  $(\varepsilon, \delta)$ -differential privacy  $(\varepsilon, \delta)$ -DP if for every pair of neighboring datasets  $X, X' \in \mathcal{X}^n$  (i.e., datasets that differ in exactly one entry),

$$\forall Y \subseteq \mathcal{Y} \quad \mathbb{P}[M(X) \in Y] \leq e^\varepsilon \cdot \mathbb{P}[M(X') \in Y] + \delta.$$

579 When  $\delta = 0$ , we say that  $M$  satisfies  $\varepsilon$ -differential privacy or pure differential privacy.

580 Neighbouring datasets are those that differ by the replacement of one individual's data. In our setting,  
581 each individual's data is assumed to correspond to one point in  $\mathcal{X} = \mathbb{R}^d$ , so neighbouring means one  
582 point is changed arbitrarily.

583 Throughout the document, we will assume that  $\varepsilon$  is smaller than some absolute constant less than  
584 1 for notational convenience, but note that our results still hold for general  $\varepsilon$ . Now, this privacy  
585 definition is closed under post-processing.

586 **Lemma A.12** (Post Processing [DMNS06]). *If  $M : \mathcal{X}^n \rightarrow \mathcal{Y}$  is  $(\varepsilon, \delta)$ -DP, and  $P : \mathcal{Y} \rightarrow \mathcal{Z}$  is any  
587 randomized function, then the algorithm  $P \circ M$  is  $(\varepsilon, \delta)$ -DP.*

## 588 A.3 Basic Differentially Private Mechanisms.

589 We first state standard results on achieving privacy via noise addition proportional to sensitiv-  
590 ity [DMNS06].

**Definition A.13** (Sensitivity). Let  $f : \mathcal{X}^n \rightarrow \mathbb{R}^d$  be a function, its  $\ell_1$ -sensitivity and  $\ell_2$ -sensitivity are

$$\Delta_{f,1} = \max_{X \sim X' \in \mathcal{X}^n} \|f(X) - f(X')\|_1 \quad \text{and} \quad \Delta_{f,2} = \max_{X \sim X' \in \mathcal{X}^n} \|f(X) - f(X')\|_2,$$

591 respectively. Here,  $X \sim X'$  denotes that  $X$  and  $X'$  are neighboring datasets (i.e., those that differ in  
592 exactly one entry).

593 One way of introducing  $(\varepsilon, \delta)$ -differential privacy is via adding noise sampled from the truncated  
594 Laplace distribution, proportional to the  $\ell_1$  sensitivity.



595 **Lemma A.14** (Truncated Laplace Mechanism [GDGK20]). *Define the probability density function*  
 596 *( $p$ ) of the truncated Laplace distribution as follows.*

$$p(x) = \begin{cases} B e^{-\frac{|x|}{\lambda}} & \text{if } x \in [-A, A] \\ 0 & \text{otherwise} \end{cases}$$

In the above,

$$\lambda = \frac{\Delta}{\varepsilon}, \quad A = \frac{\Delta}{\varepsilon} \log\left(1 + \frac{e^\varepsilon - 1}{2\delta}\right), \quad B = \frac{1}{2\lambda(1 - e^{-\frac{A}{\lambda}})}.$$

597 Let  $\text{TLap}(\Delta, \varepsilon, \delta)$  denote a draw from the above distribution.

Let  $f : \mathcal{X}^n \rightarrow \mathbb{R}^d$  be a function with sensitivity  $\Delta$ . Then the truncated Laplace mechanism

$$M(X) = f(X) + \text{TLap}(\Delta, \varepsilon, \delta)$$

598 satisfies  $(\varepsilon, \delta)$ -DP.

599 In the above  $A \leq \frac{\Delta f_{i1}}{\varepsilon} \log(1/\delta)$  since  $\varepsilon$  is smaller than some absolute constant less than 1. Now, we  
 600 introduce differentially private histograms.

601 **Lemma A.15** (Private Histograms). *Let  $n \in \mathbb{N}$ ,  $\varepsilon, \delta, \beta > 0$ , and  $\mathcal{X}$  a set. There exists  $M : \mathcal{X}^n \rightarrow \mathbb{R}^{\mathcal{X}}$*   
 602 *which is  $(\varepsilon, \delta)$ -differentially private and, for all  $x \in \mathcal{X}^n$ , we have*

$$\mathbb{P}_M \left[ \sup_{y \in \mathcal{X}} \left| M(x)_y - \frac{1}{n} |\{i \in [n] : x_i = y\}| \right| \leq O\left(\frac{\log(1/\delta\beta)}{\varepsilon n}\right) \right] \geq 1 - \beta.$$

603 The above holds due to [BNS16; Vad17]. Finally, we introduce the GAP-MAX algorithm from  
 604 [BDRS18] that outputs the element from the output space that has the highest score function, given  
 605 that there is a significant gap between the scores of the highest and the second to the highest elements.

**Lemma A.16** (GAP-MAX Algorithm [BDRS18]). *Let  $\text{SCORE} : \mathcal{X}^n \times \mathcal{Y} \rightarrow \mathbb{R}$  be a score function*  
*with sensitivity 1 in its first argument, and let  $\varepsilon, \delta > 0$ . Then there exists a  $(\varepsilon, \delta)$ -differentially*  
*private algorithm  $M : \mathcal{X}^n \rightarrow \mathcal{Y}$  and  $\alpha = \Theta(\log(1/\delta)/\varepsilon n)$  with the following property. Fix an input*  
 *$X \in \mathcal{X}^n$ . Let*

$$y^* = \arg \max_{y \in \mathcal{Y}} \{\text{SCORE}(X, y)\}.$$

Suppose

$$\forall y \in \mathcal{Y}, y \neq y^* \implies \text{SCORE}(X, y) < \text{SCORE}(X, y^*) - \alpha n.$$

606 Then  $M$  outputs  $y^*$  with probability 1.

## 607 B Proof of Privacy of Algorithm 1

608 *Proof of Lemma 4.2.* First, we argue that the sensitivity of  $u$  is 1. The quantity  $|X \cap s|$  has sensitivity  
 609 1 and so does  $\sup\{|X \cap t| : t \in \mathcal{S}_d, t \subsetneq s\}$ . This implies sensitivity 2 by the triangle inequality.  
 610 However, we see that it is not possible to change one point that simultaneously increases  $|X \cap s|$  and  
 611 decreases  $\sup\{|X \cap t| : t \in \mathcal{S}_d, t \subsetneq s\}$  or vice versa. Thus the sensitivity is actually 1.

612 We also argue that  $u(X, s_2)$  has sensitivity 1, where  $s_2$  is the candidate with the second-largest score.  
 613 Observe that the second-largest score is a monotone function of the collection of all scores – i.e.,  
 614 increasing scores cannot decrease the second-largest score and vice versa. Changing one input point  
 615 can at most increase all the scores by 1, which would only increase the second-largest score by 1.

616 This implies that  $\max\{0, u(X, s) - u(X, s_2) - 1\}$  has sensitivity 2 by the triangle inequality and the  
 617 fact that the maximum does not increase the sensitivity.

618 Now we observe that for any input  $X$  there is at most one  $s$  such that  $\max\{0, u(X, s) - u(X, s_2) -$   
 619  $1\} \neq 0$ , namely  $s = s_1$ . We can say something even stronger: Let  $X$  and  $X'$  be neighbouring datasets  
 620 with  $s_1$  and  $s_2$  the largest and second-largest scores on  $X$  and  $s'_1$  and  $s'_2$  the largest and second-  
 621 largest scores on  $X'$ . Then there is at most one  $s$  such that  $\max\{0, u(X, s) - u(X, s_2) - 1\} \neq 0$  or  
 622  $\max\{0, u(X', s) - u(X', s_2) - 1\} \neq 0$ . In other words, we cannot have both  $u(X, s_1) - u(X, s_2) > 1$   
 623 and  $u(X', s'_1) - u(X', s'_2) > 1$  unless  $s_1 = s'_1$ . This holds because  $u(X, s) - u(X, s_2)$  has sensitivity  
 624 2.

625 With these observations in hand, we can delve into the privacy analysis. Let  $X$  and  $X'$  be neighbouring  
626 datasets with  $s_1$  and  $s_2$  the largest and second-largest scores on  $X$  and  $s'_1$  and  $s'_2$  the largest and  
627 second-largest scores on  $X'$ . Let  $\mathcal{Y}$  be the set of candidates from  $X$  and let  $\mathcal{Y}'$  be the set of candidates  
628 from  $X'$ . Let  $\check{\mathcal{Y}} = \mathcal{Y} \cup \mathcal{Y}'$  and  $\hat{\mathcal{Y}} = \mathcal{Y} \cap \mathcal{Y}'$ .

629 We note that, for  $s \in \check{\mathcal{Y}}$ , if  $u(X, s) \leq \ell$ , then there is no way that  $\hat{s} = s$ . This is because  
630  $|\xi(s)| \leq \frac{2 \log(1/\delta)}{\epsilon}$  for all  $s$  and hence, there is no way we could have  $\arg \max_{s \in \mathcal{Y}} \max\{0, u(X, s) -$   
631  $u(X, s_2) - 1\} + \xi(s) \geq \arg \max_{s \in \mathcal{Y}} \max\{0, u(X, \text{NULL}) - u(X, s_2) - 1\} + \xi(\text{NULL})$ .

632 If  $s \in \check{\mathcal{Y}} \setminus \hat{\mathcal{Y}}$ , then  $u(X, s) \leq |X \cap s| \leq k + 1 \leq \ell$  and  $u(X', s) \leq \ell$ . This is because  $s \notin \hat{\mathcal{Y}}$  implies  
633  $|X \cap s| < k$  or  $|X' \cap s| < k$ , but  $|X \cap s| \leq |X' \cap s| + 1$ . Thus, there is no way these points are  
634 output and, hence, we can ignore these points in the privacy analysis. (This is the reason for adding  
635 the NULL candidate.)

636 Now we argue that the entire collection of noisy values  $\max\{0, u(X, s) - u(X, s_2) - 1\} + \xi(s)$   
637 for  $s \in \hat{\mathcal{Y}}$  is differentially private. This is because we are adding noise to a vector where (i) on the  
638 neighbouring datasets only 1 coordinate is potentially different and (ii) this coordinate has sensitivity  
639 2.  $\square$

## 640 C Lower Bound for Exact Case

641 Here, we show that our upper bound is optimal up to constants for the exact case.

642 **Theorem C.1.** *Any  $(\epsilon, \delta)$ -DP algorithm that takes a dataset of  $n$  points satisfying the conditions in*  
643 *Problem 4.1 and outputs  $s_*$  with probability  $> 0.5$  requires  $n \geq \Omega\left(\ell + \frac{\log(1/\delta)}{\epsilon}\right)$ .*

644 *Proof.* First,  $n \geq \ell + k$ . This is because we need at least  $k$  points to span the subspace, and  $\ell$  points  
645 could be corrupted. Second,  $n \geq \Omega(\log(1/\delta)/\epsilon)$  by group privacy. Otherwise, the algorithm is  
646  $(10, 0.1)$ -differentially private with respect to changing the *entire* dataset and it is clearly impossible  
647 to output the subspace under this condition.  $\square$

## 648 D Proof of Accuracy of Algorithm 2

649 Now we delve into the utility analysis of the algorithm. For  $1 \leq j \leq t$ , let  $X^j$  be the subsets of  $X$   
650 as defined in Algorithm 2, and  $\Pi_j$  be the projection matrices of their respective subspaces. We now  
651 show that  $\Pi_j$  and the projection matrix of the subspace spanned by  $\Sigma_k$  are close in operator norm.

**Lemma D.1.** *Let  $\Pi$  be the projection matrix of the subspace spanned by the vectors of  $\Sigma_k$ , and for*  
*each  $1 \leq j \leq t$ , let  $\Pi_j$  be the projection matrix as defined in Algorithm 2. If  $m \geq O(k + \ln(qt))$ ,*  
*then*

$$\mathbb{P} \left[ \forall j, \|\Pi - \Pi_j\| \leq O\left(\frac{\gamma\sqrt{d}}{\sqrt{m}}\right) \right] \geq 0.95$$

652 *Proof.* We show that the subspaces spanned by  $X^j$  and the true subspace spanned by  $\Sigma$  are close. For-  
653 mally, we invoke Lemmata A.3 and A.4. This closeness follows from standard matrix concentration  
654 inequalities.

655 Fix a  $j \in [t]$ . Note that  $X^j$  can be written as  $Y^j + H$ , where  $Y^j$  is the matrix of vectors distributed  
656 as  $\mathcal{N}(\vec{0}, \Sigma_k)$ , and  $H$  is a matrix of vectors distributed as  $\mathcal{N}(\vec{0}, \Sigma_{d-k})$ , where  $\Sigma_k$  and  $\Sigma_{d-k}$  are  
657 defined as in Remark 5.2. By Corollary A.7, with probability at least  $1 - \frac{0.02}{t}$ ,  $s_k(Y^j) \in \Theta((\sqrt{m} +$   
658  $\sqrt{k})(\sqrt{s_k(\Sigma_k)})) = \Theta(\sqrt{m} + \sqrt{k}) > 0$ . Therefore, the subspace spanned by  $Y^j$  is the same as the  
659 subspace spanned by  $\Sigma_k$ . So, it suffices to look at the subspace spanned by  $Y^j$ .

660 Now, by Corollary A.7, we know that with probability at least  $1 - \frac{0.02}{t}$ ,  $\|X^j - Y^j\| = \|H\| \leq$   
661  $O((\sqrt{m} + \sqrt{d})\sqrt{s_1(\Sigma_{d-k})}) \leq O(\gamma(\sqrt{m} + \sqrt{d})\sqrt{s_k(\Sigma_k)}) \leq O(\gamma(\sqrt{m} + \sqrt{d}))$ .

662 We wish to invoke Lemma A.3. Let  $UDV^T$  be the SVD of  $Y^j$ , and let  $\hat{U}\hat{D}\hat{V}^T$  be the SVD of  $X^j$ .  
663 Now, for a matrix  $M$ , let  $\Pi_M$  denote the projection matrix of the subspace spanned by the columns

664 of  $M$ . Define quantities  $a, b, z_{12}, z_{21}$  as follows.

$$\begin{aligned}
a &= s_{\min}(U^T X^j V) \\
&= s_{\min}(U^T Y^j V + U^T H V) \\
&= s_{\min}(U^T Y^j V) && \text{(Columns of } U \text{ are orthogonal to columns of } H) \\
&= s_k(Y^j) \\
&\in \Theta(\sqrt{m} + \sqrt{k}) \\
&\in \Theta(\sqrt{m}) \\
b &= \|U_{\perp}^T X^j V_{\perp}\| \\
&= \|U_{\perp}^T Y^j V_{\perp} + U_{\perp}^T H V_{\perp}\| \\
&= \|U_{\perp}^T H V_{\perp}\| && \text{(Columns of } U_{\perp} \text{ are orthogonal to columns of } Y^j) \\
&\leq \|H\| \\
&\leq O(\gamma(\sqrt{m} + \sqrt{d})) \\
z_{12} &= \|\Pi_U H \Pi_{V_{\perp}}\| \\
&= 0 \\
z_{21} &= \|\Pi_{U_{\perp}} H \Pi_V\| \\
&= \|\Pi_{U_{\perp}} \Sigma_{d-k}^{1/2} (\Sigma_{d-k}^{-1/2} H) \Pi_V\|
\end{aligned}$$

Now, in the above,  $\Sigma_{d-k}^{-1/2} H \in \mathbb{R}^{d \times m}$ , such that each of its entry is an independent sample from  $\mathcal{N}(0, 1)$ . Right-multiplying it by  $\Pi_V$  makes it a matrix in a  $k$ -dimensional subspace of  $\mathbb{R}^m$ , such that each row is an independent vector from a spherical Gaussian. Using Corollary A.7,  $\|\Sigma_{d-k}^{-1/2} H\| \leq O(\sqrt{d} + \sqrt{k}) \leq O(\sqrt{d})$  with probability at least  $1 - \frac{0.01}{t}$ . Also,  $\|\Pi_{U_{\perp}} \Sigma_{d-k}^{1/2}\| \leq O(\gamma \sqrt{s_k(\Sigma_k)}) \leq O(\gamma)$ . This gives us:

$$z_{21} \leq O(\gamma \sqrt{d}).$$

665 Since  $a^2 > 2b^2$ , we get the following by Lemma A.3.

$$\begin{aligned}
\|\text{Sin}(\Theta)(U, \hat{U})\| &\leq \frac{az_{21} + bz_{12}}{a^2 - b^2 - \min\{z_{12}^2, z_{21}^2\}} \\
&\leq O\left(\frac{\gamma \sqrt{d}}{\sqrt{m}}\right)
\end{aligned}$$

666 Therefore, using Lemma A.4, and applying the union bound over all  $j$ , we get the required result.  $\square$

667 Let  $\xi = O\left(\frac{\gamma \sqrt{d}}{\sqrt{m}}\right)$ . We show that the projections of any reference point are close.

**Corollary D.2.** *Let  $p_1, \dots, p_q$  be the reference points as defined in Algorithm 2, and let  $\Pi$  and  $\Pi_j$  (for  $1 \leq j \leq t$ ) be projections matrices as defined in Lemma D.1. Then*

$$\mathbb{P}\left[\forall i, j, \|(\Pi - \Pi_j)p_i\| \leq O(\xi(\sqrt{k} + \sqrt{\ln(qt)}))\right] \geq 0.9.$$

668 *Proof.* We know from Lemma D.1 that  $\|\Pi - \Pi_j\| \leq \xi$  for all  $j$  with probability at least 0.95. For  
669  $j \in [t]$ , let  $\hat{\Pi}_j$  be the projection matrix for the union of the  $j^{\text{th}}$  subspace and the subspace spanned by  
670  $\Sigma_k$ . Lemma A.10 implies that with probability at least 0.95, for all  $i, j$ ,  $\|\hat{\Pi}_j p_i\| \leq O(\sqrt{k} + \sqrt{\ln(qt)})$ .  
671 Therefore,

$$\|(\Pi - \Pi_j)p_i\| = \|(\Pi - \Pi_j)\hat{\Pi}_j p_i\| \leq \|\Pi - \Pi_j\| \cdot \|\hat{\Pi}_j p_i\| \leq O(\xi(\sqrt{k} + \sqrt{\ln(qt)})).$$

672 Hence, the claim.  $\square$

673 The above corollary shows that the projections of each reference point lie in a ball of radius  
674  $O(\xi\sqrt{k})$ . Next, we show that for each reference point, all the projections of the point lie in-  
675 side a histogram cell with high probability. For notational convenience, since each point in  $Q$  is a  
676 concatenation of the projection of all reference points on a given subspace, for all  $i, j$ , we refer to  
677  $(0, \dots, 0, Q_{(i-1)d+1}^j, \dots, Q_{id}^j, 0, \dots, 0) \in R^{qd}$  (where there are  $(i-1)d$  zeroes behind  $Q_{(i-1)d+1}^j$ ,  
678 and  $(q-i)d$  zeroes after  $Q_{id}^j$ ) as  $p_i^j$ .

**Lemma D.3.** *Let  $\ell$  and  $\lambda$  be the length of a histogram cell and the random offset respectively, as defined in Algorithm 2. For each  $1 \leq i \leq q$ , define the following event.*

$$E_i \equiv \exists \omega \in \Omega : |\omega \cap \{p_i^1, \dots, p_i^t\}| = t$$

679 Then  $\mathbb{P}[E_i \cap \dots \cap E_q] \geq 0.8$ . Thus there exists  $\omega \in \Omega$  that, such that all points in  $Q$  lie within  $\omega$ .

*Proof.* Let  $r = O(\xi(\sqrt{k} + \sqrt{\ln(qt)}))$ . This implies that  $\ell = 20rq$ . The random offset could also be viewed as moving along a diagonal of a cell by  $\lambda\ell\sqrt{dq}$ . We know that with probability at least 0.8, for each  $i$ , all projections of reference point  $p_i$  lie in a ball of radius  $r$ . Fix an  $i \in [q]$ . Then

$$\mathbb{P}[\overline{E_i}] \leq \mathbb{P}\left[\frac{1}{20q} \geq \lambda \vee \lambda \geq \frac{19}{20q}\right] = \frac{1}{10q}.$$

680 Taking the union bound over all  $q$  and the failure of the event in Corollary D.2, we get the first part of  
681 the claim. Since  $p_i^j$ 's are non-zero in disjoint sets of coordinates, the second part follows.  $\square$

682 Now, we analyse the sample complexity due to the private algorithm, that is, DP-histograms.

683 **Lemma D.4.** *For each  $1 \leq i \leq q$ , let  $\omega_i$  be the histogram cell as defined in Algorithm 2. If*  
684  $t \geq O\left(\frac{\log(1/\delta)}{\varepsilon}\right)$ , *then  $\mathbb{P}[\forall i, |\omega_i \cap \{p_i^1, \dots, p_i^t\}| = t] \geq 0.75$ .*

685 *Proof.* Lemma D.3 implies that with probability at least 0.8, for each  $i$ , all projections of  $p_i$  lie in  
686 a histogram cell, that is, all points of  $Q$  lie in a histogram cell in  $\Omega$ . Because of the error bound  
687 in Lemma A.15 and our bound on  $t$ , we see at least  $\frac{t}{2}$  points in that cell with probability at least  
688  $1 - 0.05$ . Therefore, by taking the union bound, the proof is complete.  $\square$

689 We finally show that the error of the projection matrix that is output by Algorithm 2 is small.

**Lemma D.5.** *Let  $\widehat{\Pi}$  be the projection matrix as defined in Algorithm 2, and  $n$  be the total number of samples. If*

$$\gamma^2 \in O\left(\frac{\varepsilon\alpha^2n}{d^2k^3 \ln(1/\delta)} \cdot \min\left\{\frac{1}{k}, \frac{1}{\ln(k \ln(1/\delta)/\varepsilon)}\right\}\right),$$

690  $n \geq O\left(\frac{k \log(1/\delta)}{\varepsilon} + \frac{\ln(1/\delta) \ln(\ln(1/\delta)/\varepsilon)}{\varepsilon}\right)$ , *and  $q \geq O(k)$  then with probability at least 0.7,  $\|\widehat{\Pi} - \Pi\| \leq \alpha$ .*

691 *Proof.* For each  $i \in [q]$ , let  $p_i^*$  be the projection of  $p_i$  on to the subspace spanned by  $\Sigma_k$ ,  $\widehat{p}_i$  be as  
692 defined in the algorithm, and  $p_i^j$  be the projection of  $p_i$  on to the subspace spanned by the  $j^{\text{th}}$  subset  
693 of  $X$ . From Lemma D.4, we know that all  $p_i^j$ 's are contained in a histogram cell of length  $\ell$ . This  
694 implies that  $\|p_i^j - \widehat{p}_i\| \leq \ell\sqrt{dq}$ . Since  $p_i^j$ 's and  $p_i^*$  are contained in a ball of radius  $\xi\sqrt{3d}$ , it must be  
695 the case that  $\|\widehat{p}_i - p_i^*\| \leq 2\ell\sqrt{dq}$ .

696 Now, let  $P = (p_1^*, \dots, p_q^*)$  and  $\widehat{P} = (\widehat{p}_1, \dots, \widehat{p}_q)$ . Then by above,  $\widehat{P} = P + E$ , where  $\|E\|_F \leq$   
697  $2\ell\sqrt{dq}$ . Therefore,  $\|E\| \leq 2\ell\sqrt{dq}$ . Let  $E = E_P + E_{\overline{P}}$ , where  $E_P$  is the component of  $E$  in the  
698 subspace spanned by  $P$ , and  $E_{\overline{P}}$  be the orthogonal component. Let  $P' = P + E_P$ . We will be  
699 analysing  $\widehat{P}$  with respect to  $P'$ .

700 Now, with probability at least 0.95,  $s_k(P) \in \Theta(\sqrt{k})$  due to our choice of  $q$  and using Corollary A.7,  
701 and  $s_{k+1}(P) = 0$ . So,  $s_{k+1}(P') = 0$  because  $E_P$  is in the same subspace as  $P$ . Now, using  
702 Lemma A.2, we know that  $s_k(P') \geq s_k(P) - \|E_P\| \geq \Omega(\sqrt{k}) > 0$ . This means that  $P'$  has rank  $k$ ,  
703 so the subspaces spanned by  $\Sigma_k$  and  $P'$  are the same.

704 As before, we will try to bound the distance between the subspaces spanned by  $P'$  and  $\widehat{P}$ . Note that  
 705 using Lemma A.1, we know that  $s_k(P') \leq s_k(P) + \|E_P\| \leq O(\sqrt{k})$ .

706 We wish to invoke Lemma A.3 again. Let  $UDV^T$  be the SVD of  $P'$ , and let  $\widehat{U}\widehat{D}\widehat{V}^T$  be the SVD  
 707 of  $\widehat{P}$ . Now, for a matrix  $M$ , let  $\Pi_M$  denote the projection matrix of the subspace spanned by the  
 708 columns of  $M$ . Define quantities  $a, b, z_{12}, z_{21}$  as follows.

$$\begin{aligned}
 a &= s_{\min}(U^T \widehat{P} V) \\
 &= s_{\min}(U^T P' V + U^T E_{\overline{P}} V) \\
 &= s_{\min}(U^T P' V) && \text{(Columns of } U \text{ are orthogonal to columns of } E_{\overline{P}}) \\
 &= s_k(P') \\
 &\in \Theta(\sqrt{k}) \\
 b &= \|U_{\perp}^T \widehat{P} V_{\perp}\| \\
 &= \|U_{\perp}^T P' V_{\perp} + U_{\perp}^T E_{\overline{P}} V_{\perp}\| \\
 &= \|U_{\perp}^T E_{\overline{P}} V_{\perp}\| && \text{(Columns of } U_{\perp} \text{ are orthogonal to columns of } P') \\
 &\leq \|E_{\overline{P}}\| \\
 &\leq O(\ell\sqrt{dq}) \\
 z_{12} &= \|\Pi_U E_{\overline{P}} \Pi_{V_{\perp}}\| \\
 &= 0 \\
 z_{21} &= \|\Pi_{U_{\perp}} E_{\overline{P}} \Pi_V\| \\
 &\leq \|E_{\overline{P}}\| \\
 &\leq O(\ell\sqrt{dq})
 \end{aligned}$$

709 Using Lemma A.3, we get the following.

$$\begin{aligned}
 \|\text{Sin}(\Theta)(U, \widehat{U})\| &\leq \frac{az_{21} + bz_{12}}{a^2 - b^2 - \min\{z_{12}^2, z_{21}^2\}} \\
 &\leq O\left(\ell\sqrt{dk}\right) \\
 &\leq \alpha
 \end{aligned}$$

710 This completes our proof. □

## 711 E Boosting

712 In this section, we discuss boosting of error guarantees of Algorithm 2. The approach we use is  
 713 very similar to the well-known Median-of-Means method: we run the algorithm multiple times, and  
 714 choose an output that is close to all other “good” outputs. We formalise this in Algorithm 3.

715 Now, we present the main result of this section.

**Theorem E.1.** *Let  $\Sigma \in \mathbb{R}^{d \times d}$  be an arbitrary, symmetric, PSD matrix of rank  $\geq k \in \{1, \dots, d\}$ , and let  $0 < \gamma < 1$ . Suppose  $\Pi$  is the projection matrix corresponding to the subspace spanned by the vectors of  $\Sigma_k$ . Then given*

$$\gamma^2 \in O\left(\frac{\varepsilon \alpha^2 n}{d^2 k^3 \ln(1/\delta)} \cdot \min\left\{\frac{1}{k}, \frac{1}{\ln(k \ln(1/\delta)/\varepsilon)}\right\}\right),$$

*such that  $\lambda_{k+1}(\Sigma) \leq \gamma^2 \lambda_k(\Sigma)$ , for every  $\varepsilon, \delta > 0$ , and  $0 < \alpha, \beta < 1$ , there exists and  $(\varepsilon, \delta)$ -DP algorithm that takes*

$$n \geq O\left(\frac{k \log(1/\delta) \log(1/\beta)}{\varepsilon} + \frac{\log(1/\delta) \log(\log(1/\delta)/\varepsilon) \log(1/\beta)}{\varepsilon}\right)$$

716 *samples from  $\mathcal{N}(\vec{0}, \Sigma)$ , and outputs a projection matrix  $\widehat{\Pi}$ , such that  $\|\Pi - \widehat{\Pi}\| \leq \alpha$  with probability*  
 717 *at least  $1 - \beta$ .*

**Algorithm 3:** DP Approximate Subspace Estimator Boosted DPASEB $_{\varepsilon, \delta, \alpha, \beta, \gamma, k}(X)$ 

```
Input: Samples  $X_1, \dots, X_n \in \mathbb{R}^d$ . Parameters  $\varepsilon, \delta, \alpha, \beta, \gamma, k > 0$ .  
Output: Projection matrix  $\widehat{\Pi} \in \mathbb{R}^{d \times d}$  of rank  $k$ .  
Set parameters:  $t \leftarrow C_3 \log(1/\beta)$       $m \leftarrow \lfloor n/t \rfloor$   
Split  $X$  into  $t$  datasets of size  $m$ :  $X^1, \dots, X^t$ .  
// Run DPASE  $t$  times to get multiple projection matrices.  
For  $i \leftarrow 1, \dots, t$   
     $\widehat{\Pi}_i \leftarrow \text{DPASE}_{\varepsilon, \delta, \alpha, \gamma, k}(X^i)$   
// Select a good subspace.  
For  $i \leftarrow 1, \dots, t$   
     $c_i \leftarrow 0$   
    For  $j \in [t] \setminus \{i\}$   
        If  $\|\widehat{\Pi}_i - \widehat{\Pi}_j\| \leq 2\alpha$   
             $c_i \leftarrow c_i + 1$   
    If  $c_i \geq 0.6t - 1$   
        Return  $\widehat{\Pi}_i$ .  
// If there were not enough good subspaces, return  $\perp$ .  
Return  $\perp$ .
```

718 *Proof.* Privacy holds trivially by Theorem 1.2.

719 We know by Theorem 1.2 that for each  $i$ , with probability at least 0.7,  $\|\widehat{\Pi}_i - \Pi\| \leq \alpha$ . This means  
720 that by Lemma A.9, with probability at least  $1 - \beta$ , at least  $0.6t$  of all the computed projection  
721 matrices are accurate.

722 This means that there has to be at least one projection matrix that is close to  $0.6t - 1 > 0.5t$  of these  
723 accurate projection matrices. So, the algorithm cannot return  $\perp$ .

724 Now, we want to argue that the returned projection matrix is accurate, too. Any projection matrix that  
725 is close to at least  $0.6t - 1$  projection matrices must be close to at least one accurate projection matrix  
726 (by pigeonhole principle). Therefore, by triangle inequality, it will be close to the true subspace.  
727 Therefore, the returned projection matrix is also accurate.  $\square$
